# Supplementary material
Source: PubMed Central journal article supplement (PMC6128619)
Supplement: bi8b00559_si_001.pdf [file bi8b00559_si_001.pdf]

## SUPPORTING INFORMATION

Allosteric activation shifts the rate-limiting step in a short-form ATP phosphoribosyltransferase

Gemma Fisher,<sup>‡</sup> Catherine M. Thomson,<sup>‡</sup> Rozanne Stroek,<sup>‡</sup> Clarissa M. Czekster,<sup>‡</sup> Jennifer S. Hirschi,<sup>§,\*</sup> and Rafael G. da Silva<sup>‡,\*</sup>

<sup>‡</sup>School of Biology, Biomedical Sciences Research Complex, University of St Andrews, St Andrews, Fife KY16 9ST UK

<sup>§</sup>Department of Chemistry, Binghamton University, Binghamton, New York 13902 USA

\*To whom correspondence may be addressed: [rgds@st-andrews.ac.uk](mailto:rgds@st-andrews.ac.uk), phone: +44 01334 463496, and [jhirschi@binghamton.edu](mailto:jhirschi@binghamton.edu).

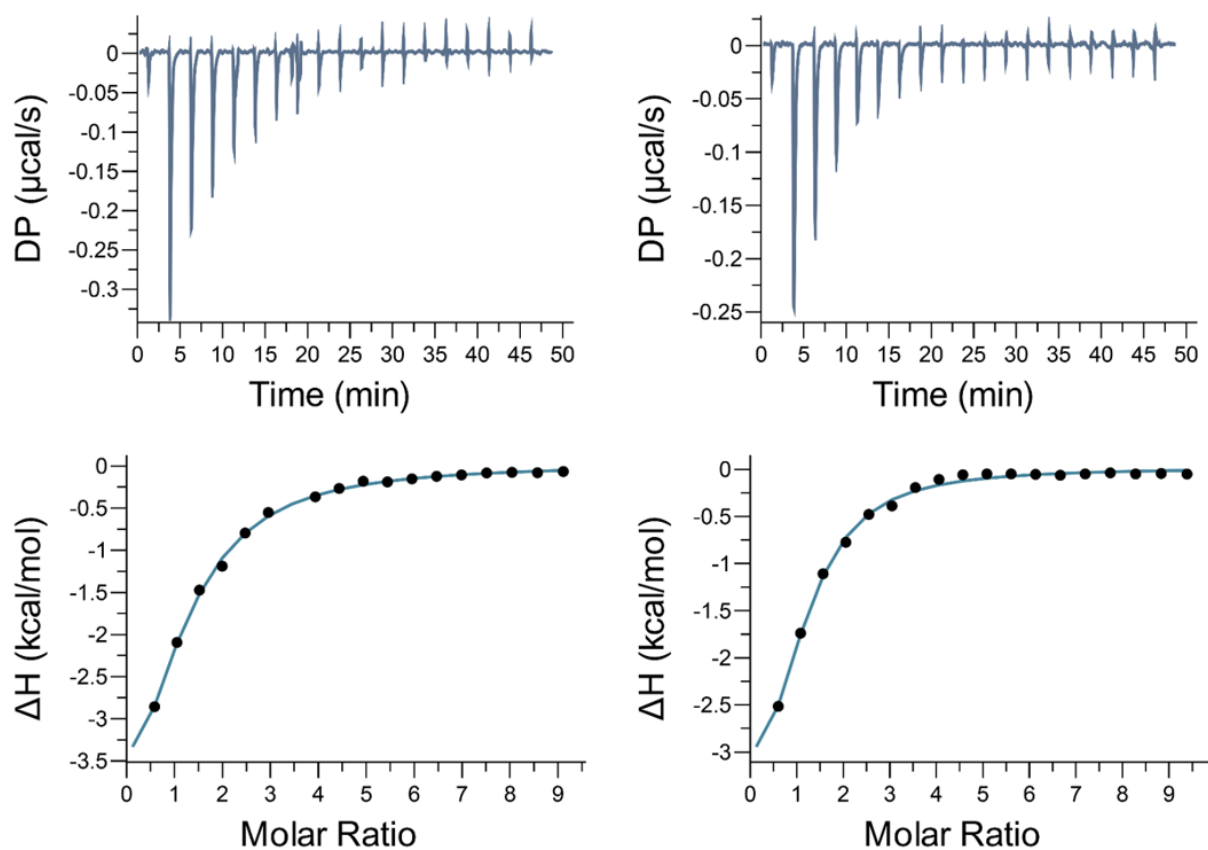

**Figure S1.** ITC curves for *PaHisG<sub>S</sub>* titration with PRPP in two independent experiments. Controls lacking *PaHisG<sub>S</sub>* have been subtracted from the data, and the solid lines represent data fitting to a single-site binding model.

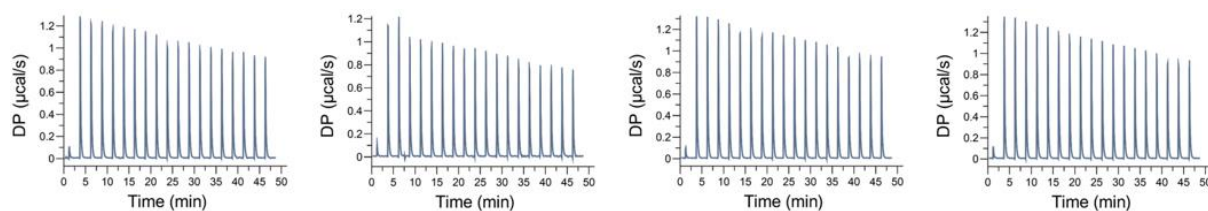

**Figure S2.** ITC curves for *PaHisG<sub>S</sub>* (two graphs on the left) and buffer (two graphs on the right) titration with ATP in two independent experiments. No signal is detected beyond the heat of dilution when experimental and control sets are compared.

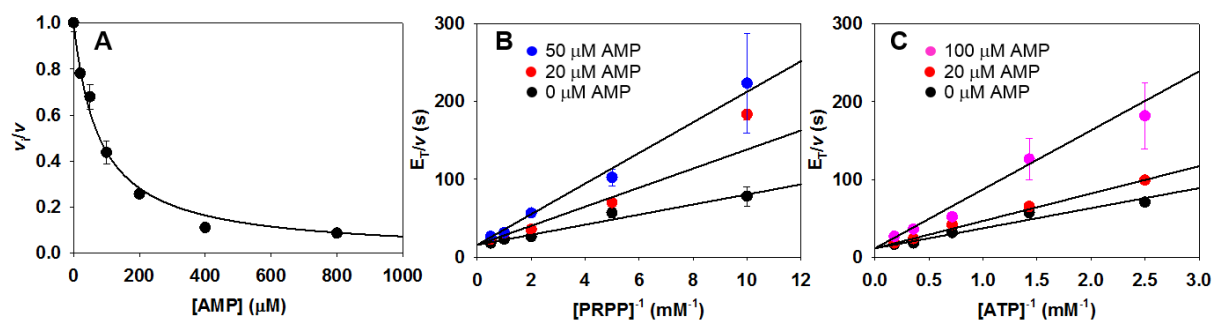

**Figure S3.** *PaHisG<sub>S</sub>* inhibition by AMP. (A) Dose-response curve for AMP concentration. Line represents data fitting to eq 4. (B) and (C) Double-reciprocals of substrate saturation curves in the presence of AMP. Lines are the reciprocals of data fitting to eq 5.

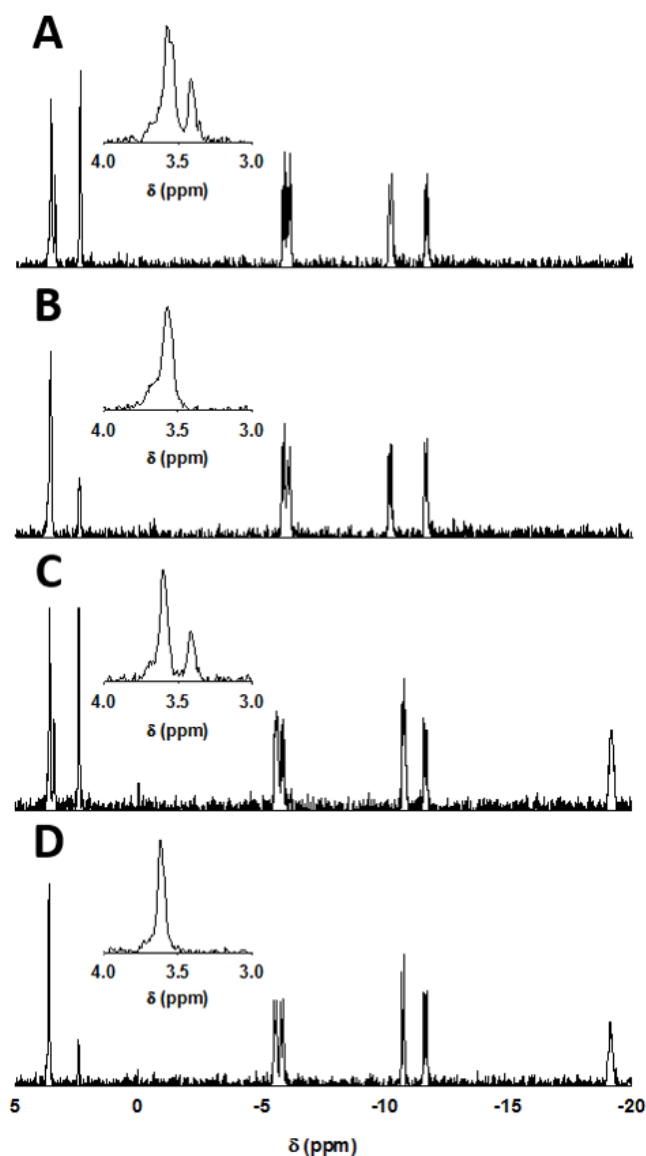

**Figure S4.**  $^{31}\text{P}$ -NMR spectra of *PaHisGs* reaction with either (A) ADP or (C) ATP as substrate. (B) and (D) are controls for (A) and (B), respectively, in the absence of *PaHisGs*. Insets in A – D are close-ups of the spectra between 4.0 and 3.0 ppm, showing the peak at *ca.* 3.3 ppm in A and C corresponding to the phosphorus in the  $N^1$ -5-phospho- $\beta$ -D-ribose moiety of PRATP and PRADP, respectively, which is missing in insets in B and D.

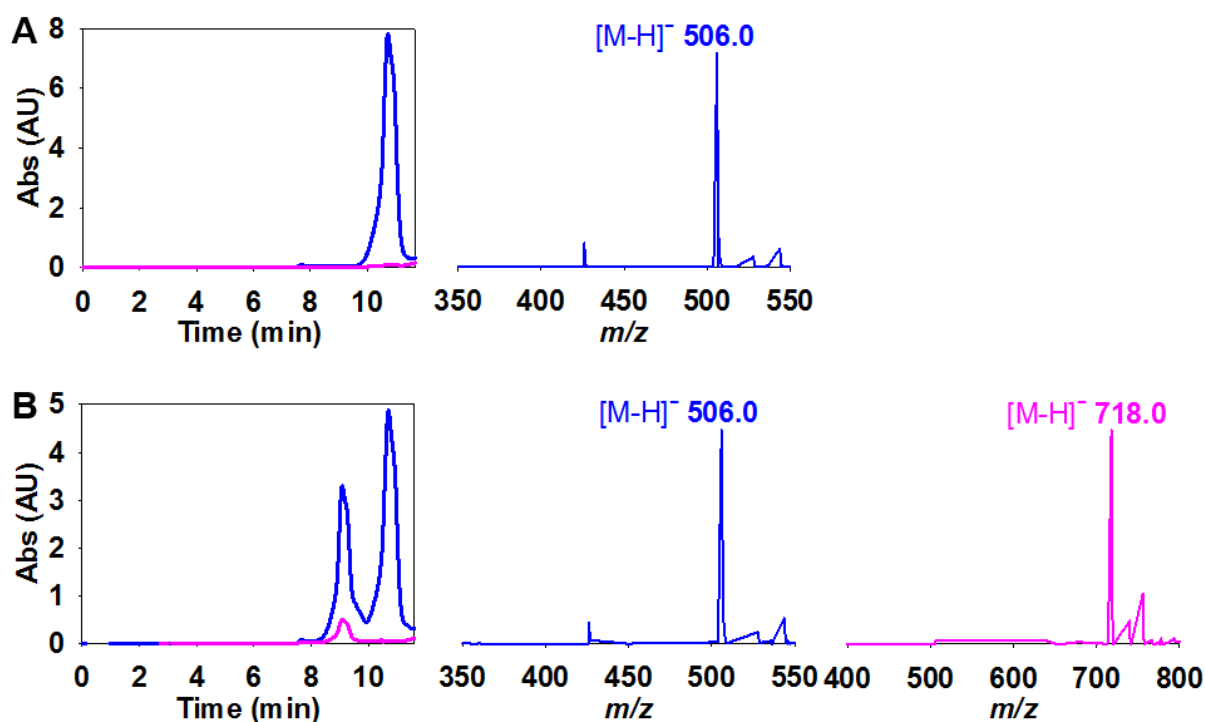

**Figure S5.** Analysis of *PaHisGs*-catalysed reaction with  $\text{Mn}^{2+}$  replacing  $\text{Mg}^{2+}$ . (A) Chromatogram of the control reaction lacking *PaHisGs*, showing a peak with absorbance at 260 nm (blue), corresponding to ATP, and mass spectra of the peak showing the expected  $m/z$  for ATP (blue). (B) Chromatogram of the reaction, showing peaks with absorbance at 260 nm (blue) and at both 260 nm and 290 nm (pink), corresponding to ATP and PRATP, respectively, and mass spectra of the peak absorbing at 260 nm showing the expected  $m/z$  for ATP (blue), and of the peak absorbing at both 260 nm and 290 nm showing the expected  $m/z$  for PRATP (pink).

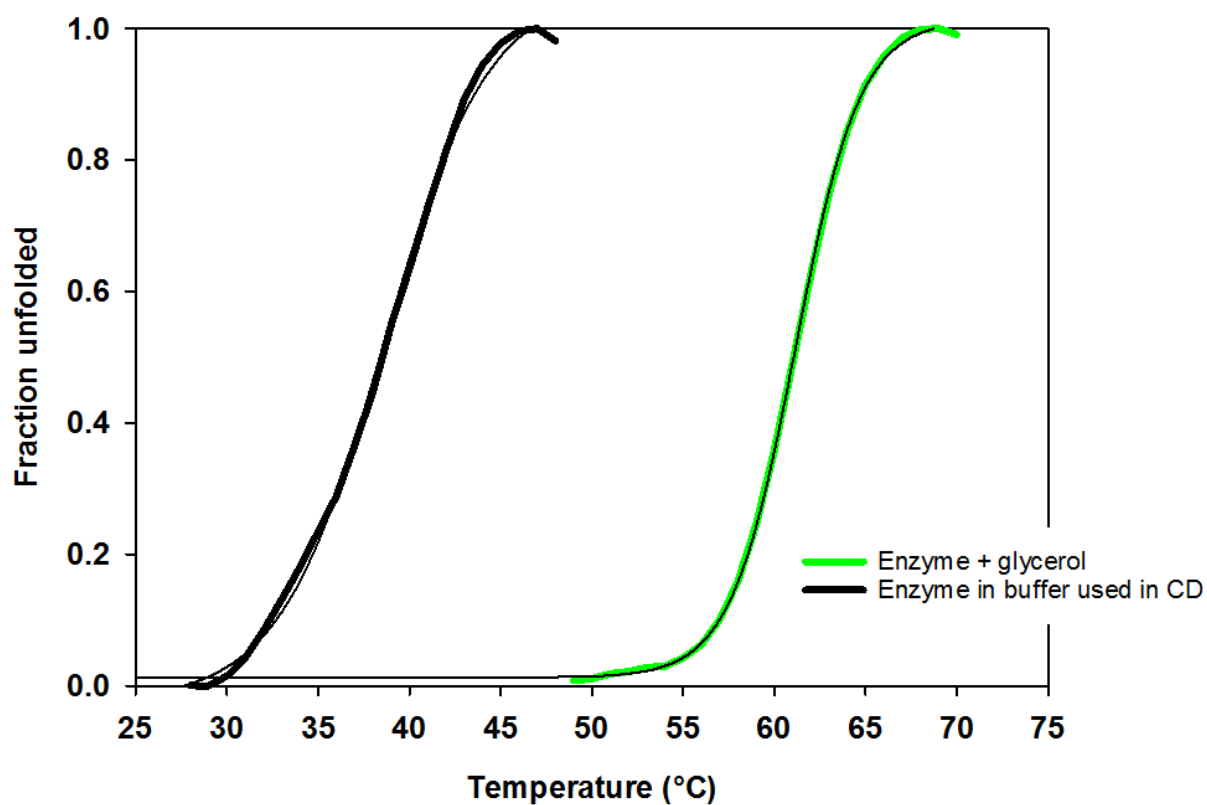

**Figure S6.** DSF-based thermal denaturation of *PaHisGs* in the presence of 22% glycerol (v/v), and in 10 mM  $\text{KH}_2\text{PO}_4$ , 10 mM KF pH 8.0, which was the buffer used for circular dichroism (CD) thermal denaturation studies of *PaHisGs*,<sup>1</sup> indicating that the protein is more thermolabile in that buffer. Data were fitted to eq 8.

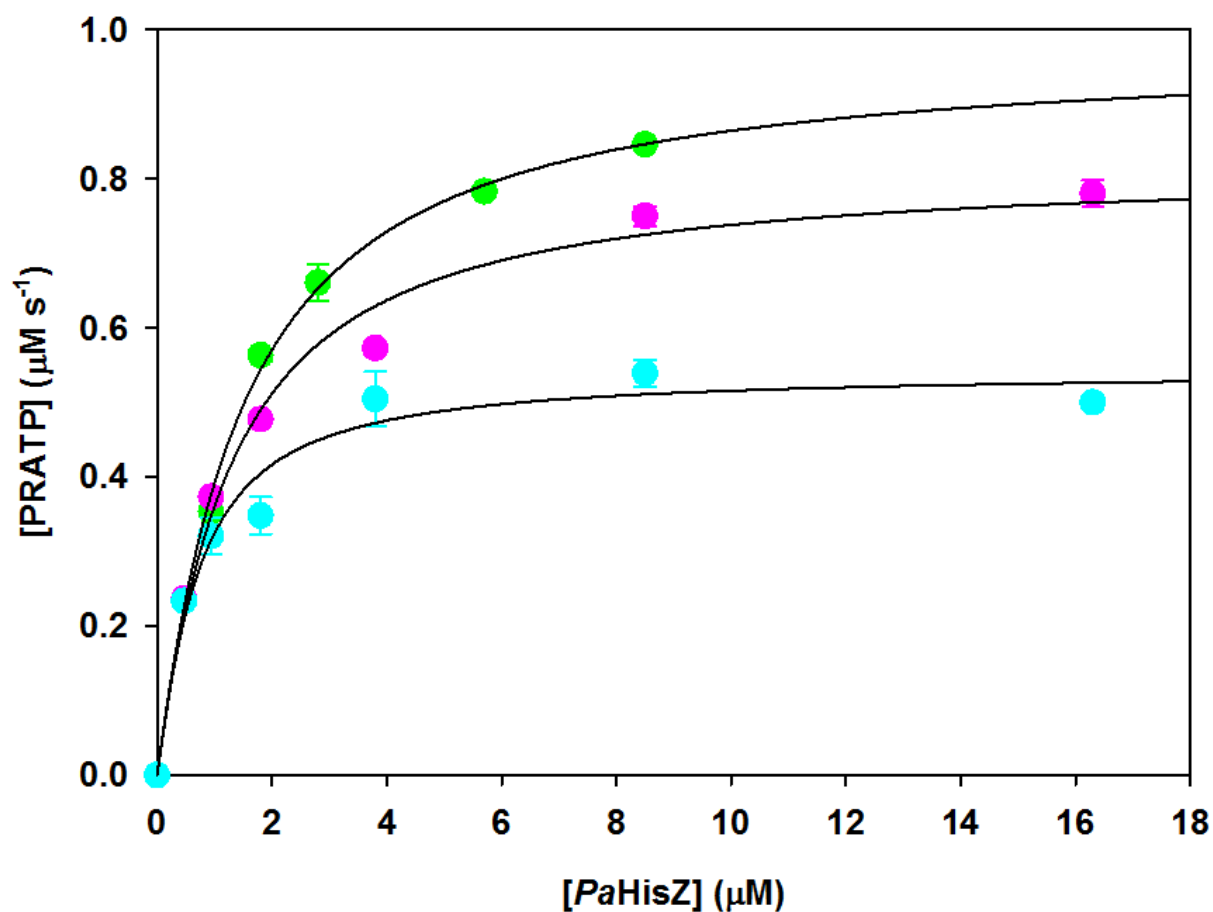

**Figure S7.** Determination of  $K_D$  for equilibrium dissociation of *PaHisZ* from the *PaATPPRT* holoenzyme in 0% glycerol (green), 18% glycerol (pink), and 27% glycerol (cyan) (v/v). Lines are data fitting to eq 1.

**Table S1.** *PaATPPRT* and *PaHisGs* steady-state parameters from initial velocity patterns.

| Parameter                                                           | <i>PaATPPRT</i> <sup>a</sup> | <i>PaHisGs</i> <sup>b</sup> |
|---------------------------------------------------------------------|------------------------------|-----------------------------|
| $k_{\text{cat}}$ (s <sup>-1</sup> )                                 | 1.5 ± 0.1                    | 0.25 ± 0.02                 |
| $K_{\text{iPRPP}}$ (mM)                                             | 0.4 ± 0.1                    | 0.04 ± 0.03                 |
| $K_{\text{PRPP}}$ (mM)                                              | 0.7 ± 0.1                    | 0.6 ± 0.1                   |
| $K_{\text{ATP}}$ (mM)                                               | 1.4 ± 0.2                    | 2.3 ± 0.3                   |
| $k_{\text{cat}}/K_{\text{PRPP}}$ (M <sup>-1</sup> s <sup>-1</sup> ) | 2142 ± 337                   | 416 ± 77                    |
| $k_{\text{cat}}/K_{\text{ATP}}$ (M <sup>-1</sup> s <sup>-1</sup> )  | 1071 ± 168                   | 108 ± 16                    |

<sup>a</sup>Values represent mean ± fitting error of duplicate measurements. <sup>b</sup>Values represent mean ± fitting error of quadruplicate measurements.

**Table S2.** *PaHisGs*  $T_m$ 's by DSF in the presence and absence of ligands.<sup>a</sup>

| Ligand                                                                                         | $T_m$ (°C) |
|------------------------------------------------------------------------------------------------|------------|
| Enzyme (no ligand)                                                                             | 60.0 ± 0.1 |
| PRPP                                                                                           | 66.0 ± 0.1 |
| ATP                                                                                            | 59.0 ± 0.1 |
| PRATP                                                                                          | 65.0 ± 0.1 |
| PP <sub>i</sub>                                                                                | 59.0 ± 0.1 |
| Enzyme (no ligand) in 22% glycerol (v/v)                                                       | 61.0 ± 0.1 |
| Enzyme (no ligand) in 10 mM K <sub>2</sub> HPO <sub>4</sub> ,<br>10 mM KF, pH 8.0 <sup>b</sup> | 39.0 ± 0.2 |

<sup>a</sup>Values represent mean ± fitting error of triplicate measurements. <sup>b</sup>Buffer used in a previous circular dichroism-based thermal denaturation.<sup>1</sup>



**Table S3.** Steady-state kinetic constants for *PaHisGs*<sup>a</sup> with either ATP or ADP.

| Parameter                                                                          | ATP         | ADP         |
|------------------------------------------------------------------------------------|-------------|-------------|
| $k_{\text{cat}}$ (s <sup>-1</sup> )                                                | 0.15 ± 0.01 | 0.14 ± 0.01 |
| $K_M^{\text{A(X)P}}$ (mM), X = T or D                                              | 0.96 ± 0.09 | 3.2 ± 0.3   |
| $K_M^{\text{PRPP}}$ (mM)                                                           | 0.39 ± 0.07 | 0.91 ± 0.08 |
| $k_{\text{cat}}/K_M^{\text{A(X)P}}$ (M <sup>-1</sup> s <sup>-1</sup> ), X = T or D | 156 ± 20    | 43 ± 5      |
| $k_{\text{cat}}/K_M^{\text{PRPP}}$ (M <sup>-1</sup> s <sup>-1</sup> )              | 384 ± 70    | 153 ± 6     |

<sup>a</sup>Values represent mean ± fitting error of duplicate measurements.

**Table S4.** Effect of Mn<sup>2+</sup> on *PaATPPRT* and *PaHisGs* steady-state kinetic parameters.<sup>a</sup>

| Parameter                                                             | <i>PaHisGs</i><br>Mg <sup>2+</sup> | <i>PaHisGs</i><br>Mn <sup>2+</sup> | <i>PaATPPRT</i><br>Mg <sup>2+</sup> | <i>PaATPPRT</i><br>Mn <sup>2+</sup> |
|-----------------------------------------------------------------------|------------------------------------|------------------------------------|-------------------------------------|-------------------------------------|
| $k_{\text{cat}}$ (s <sup>-1</sup> )                                   | 0.15 ± 0.01                        | 0.39 ± 0.05                        | 2.7 ± 0.1                           | 2.1 ± 0.1                           |
| $K_M^{\text{PRPP}}$ (mM)                                              | 0.33 ± 0.03                        | 0.6 ± 0.2                          | 0.43 ± 0.06                         | 0.28 ± 0.06                         |
| $K_M^{\text{ATP}}$ (mM)                                               | 1.4 ± 0.2                          | 0.30 ± 0.05                        | 0.72 ± 0.09                         | 0.19 ± 0.03                         |
| $k_{\text{cat}}/K_M^{\text{PRPP}}$ (M <sup>-1</sup> s <sup>-1</sup> ) | 450 ± 50                           | 700 ± 200                          | 6000 ± 900                          | 7500 ± 2000                         |
| $k_{\text{cat}}/K_M^{\text{ATP}}$ (M <sup>-1</sup> s <sup>-1</sup> )  | 110 ± 20                           | 1300 ± 300                         | 3800 ± 500                          | 11100 ± 2000                        |

<sup>a</sup>Values represent mean ± fitting error of duplicate measurements.

**Table S5.** NBO charge distribution of key atoms at the transition state of *PaHisGs*.

| Atom                                | Transition state with Mg <sup>2+</sup> NBO charge | Transition state with Mn <sup>2+</sup> NBO charge |
|-------------------------------------|---------------------------------------------------|---------------------------------------------------|
| ADP N1                              | -0.563                                            | -0.562                                            |
| ADP N6                              | -0.783                                            | -0.783                                            |
| ADP C6                              | 0.455                                             | 0.453                                             |
| 5-phosphoribosyl C1                 | 0.410                                             | 0.399                                             |
| 5-phosphoribosyl O4                 | -0.459                                            | -0.459                                            |
| PPi Os bonded to metal ion 1        | -1.208 (average of 2 O atoms)                     | -1.053 (average of 2 O atoms)                     |
| PPi Os bonded to metal ion 2        | -1.162 (average of 2 charges)                     | -1.026 (average of 2 charges)                     |
| Metal ion 1 (bonded to PPi)         | 1.437                                             | 0.610                                             |
| Metal ion 2 (bonded to PPi and ADP) | 1.439                                             | 0.688                                             |

**Table S6.** Solvent viscosity effects on *PaHisGs* steady-state kinetic parameters.<sup>a</sup>

| Parameter                                               | 0% glycerol (v/v) | 18% glycerol (v/v) | 27% glycerol (v/v) |
|---------------------------------------------------------|-------------------|--------------------|--------------------|
| $k_{cat}$ (s <sup>-1</sup> )                            | 0.15 ± 0.02       | 0.28 ± 0.05        | 0.40 ± 0.02        |
| $K_M^{PRPP}$ (mM)                                       | 0.36 ± 0.04       | 0.35 ± 0.02        | 0.41 ± 0.08        |
| $K_M^{ATP}$ (mM)                                        | 1.2 ± 0.1         | 1.9 ± 0.2          | 1.9 ± 0.2          |
| $k_{cat}/K_M^{PRPP}$ (M <sup>-1</sup> s <sup>-1</sup> ) | 416 ± 70          | 800 ± 150          | 976 ± 197          |
| $k_{cat}/K_M^{ATP}$ (M <sup>-1</sup> s <sup>-1</sup> )  | 125 ± 19          | 147 ± 30           | 210 ± 24           |

<sup>a</sup>Values represent mean ± fitting error of duplicate measurements.

**Table S7.** Solvent viscosity effects on *Pa*ATPPRT steady-state kinetic parameters.<sup>a</sup>

| Parameter                                                                      | 0% glycerol (v/v) | 18% glycerol (v/v) | 27% glycerol (v/v) |
|--------------------------------------------------------------------------------|-------------------|--------------------|--------------------|
| $k_{\text{cat}}$ (s <sup>-1</sup> )                                            | 2.6 ± 0.1         | 1.8 ± 0.1          | 1.03 ± 0.03        |
| $K_{\text{M}}^{\text{PRPP}}$ (mM)                                              | 0.29 ± 0.04       | 0.18 ± 0.03        | 0.10 ± 0.01        |
| $K_{\text{M}}^{\text{ATP}}$ (mM)                                               | 0.62 ± 0.05       | 0.8 ± 0.1          | 0.35 ± 0.03        |
| $k_{\text{cat}}/K_{\text{M}}^{\text{PRPP}}$ (M <sup>-1</sup> s <sup>-1</sup> ) | 9000 ± 1000       | 10000 ± 2000       | 10300 ± 1000       |
| $k_{\text{cat}}/K_{\text{M}}^{\text{ATP}}$ (M <sup>-1</sup> s <sup>-1</sup> )  | 4200 ± 400        | 2300 ± 300         | 2900 ± 300         |

<sup>a</sup>Values represent mean ± fitting error of duplicate measurements.

## Coordinates of DFT-calculated structures

freeTS.log – Transition structure with Mg. No  
bonds fixed

C-N = 2.27 Å

C-O = 2.36 Å

Free Energy = -6563.285823

Zero-point Energy = -6563.129757

Potential Energy = -6564.43503489

Nimag = 1 (-213.6872 cm<sup>-1</sup>)

B3LYP/6-31G\* Lan12DZ Mg

Charge = 0 Multiplicity = 1

C 6.00173 2.41014 -3.48936

N 5.38563 2.48673 -2.16756

C 6.04446 2.27531 -1.03983

N 7.34263 1.84189 -1.09453

N 5.49807 2.55615 0.15676

C -3.42882 5.88323 -1.52591

N -2.07112 5.45683 -1.25600

C -1.75014 4.56423 -0.31899

N -0.46749 4.21778 -0.14928

N -2.69914 4.05555 0.49640

C -7.72998 -6.29125 -2.67671

C -6.97081 -5.00119 -2.37462

O -7.68214 -3.99594 -2.04788

O -5.71840 -5.01367 -2.48884

C -2.68316 -4.74773 -1.67193

N -3.73706 -3.79056 -1.25803

C 1.85167 6.39827 -4.04333

C 0.74281 5.91937 -3.11015

O -0.24287 6.65724 -2.90882

O 0.90075 4.75810 -2.57520

O 9.56895 -2.76848 -2.35734

O 6.77660 -0.76212 1.06195

O -8.24201 0.06620 -4.38478

O 5.16032 -3.85934 3.05156

O -8.52193 -3.01436 0.30732

O 8.04709 -4.78102 -1.28557

O 6.39400 -3.55804 0.71943

O 2.68261 2.89820 -2.09953

O -3.38992 3.60041 4.96396

O -1.71523 1.48930 5.26448

O -4.11871 -3.83444 1.45269

O 0.25632 -4.07255 3.62100

O 2.54971 -3.44330 2.43630

O -2.29354 1.86574 2.29591

P -3.60212 1.11901 2.54510

O -4.43716 1.49992 3.73812

O -3.24775 -0.49011 2.66747

P -1.84733 -1.28411 2.42085

O -1.37410 -1.14148 0.98350

O -0.87101 -0.39911 3.42053

O -2.01000 -2.67952 2.97812

O -4.45148 1.21764 1.17564

C -5.87845 0.97356 1.22789

C -6.35182 0.31430 -0.04874

C -5.61835 -0.97722 -0.43762

O -5.97648 -2.10488 0.31892

C -5.90827 -1.03333 -1.95825

O -7.24065 -1.42190 -2.21191

C -5.79294 0.45340 -2.32764

O -6.18081 1.19348 -1.17334

N -4.43696 0.89421 -2.72426

C -3.18745 0.31765 -2.63254

C -2.28328 1.34785 -2.92048

|    |          |          |          |   |          |          |          |
|----|----------|----------|----------|---|----------|----------|----------|
| N  | -2.93822 | 2.52980  | -3.19032 | H | 4.49481  | 2.79835  | 0.25563  |
| C  | -4.20328 | 2.21487  | -3.06345 | H | 5.86041  | 2.03559  | 0.94505  |
| N  | -2.84020 | -0.96188 | -2.35426 | H | -4.05557 | 5.05610  | -1.88540 |
| C  | -1.52767 | -1.12777 | -2.33041 | H | -3.38404 | 6.63749  | -2.31346 |
| N  | -0.55233 | -0.22357 | -2.53064 | H | -1.31797 | 5.87020  | -1.85423 |
| C  | -0.89766 | 1.06569  | -2.82633 | H | -0.20017 | 3.50508  | 0.52569  |
| N  | 0.04052  | 2.00242  | -2.99123 | H | 0.18868  | 4.46957  | -0.90135 |
| O  | 7.37272  | -2.23004 | -3.72734 | H | -3.66330 | 4.12638  | 0.20883  |
| P  | 6.44806  | -1.86461 | -2.48081 | H | -2.47905 | 3.24510  | 1.08055  |
| O  | 7.24088  | -0.97747 | -1.49940 | H | -7.04422 | -7.12178 | -2.85628 |
| O  | 5.73189  | -3.06321 | -1.87461 | H | -8.36042 | -6.14151 | -3.56064 |
| O  | 5.33495  | -0.90131 | -3.21688 | H | -2.55449 | -4.70385 | -2.75509 |
| C  | 3.95678  | -1.24700 | -3.20185 | H | -1.74388 | -4.51187 | -1.16546 |
| C  | 3.33739  | -1.01370 | -1.81439 | H | -3.84509 | -3.79286 | -0.20452 |
| O  | 2.24548  | -0.01828 | -1.91281 | H | -4.65961 | -4.10621 | -1.70793 |
| C  | 2.72718  | -2.20951 | -1.06292 | H | -3.52581 | -2.82937 | -1.56733 |
| O  | 3.45328  | -2.42304 | 0.14631  | H | 2.02028  | 5.65867  | -4.83433 |
| C  | 1.26299  | -1.78359 | -0.74202 | H | 2.78933  | 6.49378  | -3.48277 |
| O  | 0.94469  | -2.04360 | 0.59364  | H | 9.29456  | -2.04387 | -1.76777 |
| C  | 1.25100  | -0.32047 | -1.14806 | H | 6.89025  | -0.80842 | 0.05029  |
| O  | 2.43374  | 0.26422  | 0.80300  | H | -8.99798 | 0.51097  | -3.97245 |
| P  | 2.11966  | 1.67642  | 1.40827  | H | -7.99961 | -0.61951 | -3.72625 |
| O  | 2.76431  | 2.81307  | 0.63806  | H | 5.71807  | -4.35353 | 3.67097  |
| O  | 0.63350  | 1.86470  | 1.76016  | H | 5.58889  | -3.93263 | 2.14687  |
| O  | 2.93039  | 1.56518  | 2.88266  | H | -8.46337 | -3.72649 | 0.96333  |
| P  | 2.20367  | 0.74352  | 4.08156  | H | -8.42808 | -3.47493 | -0.56437 |
| O  | 1.77861  | -0.64569 | 3.52587  | H | 7.26063  | -4.55191 | -1.81855 |
| O  | 1.06547  | 1.54040  | 4.66380  | H | 7.75696  | -4.50830 | -0.39264 |
| O  | 3.40645  | 0.54861  | 5.12631  | H | 5.94768  | -3.44410 | -0.16612 |
| Mg | -0.59689 | 1.79403  | 3.42999  | H | 6.65654  | -2.63318 | 0.92560  |
| H  | 5.39896  | 3.01198  | -4.17304 | H | 2.56979  | 2.87802  | -1.11792 |
| H  | 6.03219  | 1.37866  | -3.85506 | H | 2.20009  | 3.72709  | -2.38389 |
| H  | 4.36398  | 2.70486  | -2.13400 | H | -3.99493 | 4.07706  | 5.55102  |
| H  | 7.78437  | 1.76839  | -0.18658 | H | -3.93796 | 2.94296  | 4.44235  |
| H  | 7.47916  | 0.98231  | -1.63850 | H | -2.42271 | 2.15537  | 5.41942  |

H -2.14300 0.61916 5.28836  
H -4.81059 -3.14205 1.40688  
H -3.41751 -3.49505 2.05230  
H -0.58235 -3.65776 3.28646  
H 0.27173 -3.83162 4.55992  
H 3.31718 -3.82704 2.91161  
H 1.68912 -3.74159 2.86754  
H -6.12769 0.31839 2.06743  
H -6.38210 1.93382 1.37641  
H -7.42228 0.09213 0.07222  
H -4.54454 -0.83056 -0.28375  
H -6.94886 -2.31771 0.24974  
H -5.20119 -1.65552 -2.51236  
H -7.30309 -2.42663 -2.19202  
H -6.46522 0.70458 -3.15219  
H -5.03332 2.89515 -3.20059  
H -1.18839 -2.13708 -2.11355  
H -0.21171 2.98820 -3.04520  
H 3.47030 -0.58318 -3.92097  
H 3.81628 -2.28327 -3.52265  
H 4.06675 -0.52398 -1.16877  
H 2.76744 -3.11908 -1.66432  
H 3.21541 -3.30374 0.50207  
H 0.58541 -2.31901 -1.41295  
H -0.02599 -1.71102 0.77204  
H 0.62901 0.45593 -0.73723  
H 7.01693 2.81473 -3.45489  
H -3.90017 6.33468 -0.64270  
H -8.40064 -6.53522 -1.84549  
H -3.00570 -5.75179 -1.39397  
Mg 2.59711 -1.42550 1.87403  
O 4.55375 -1.21690 2.73801  
H 4.87573 -2.10587 3.03161  
H 5.25742 -0.88558 2.13225  
H 1.03202 1.84794 -2.80948

H 4.09073 0.00093 4.69294  
O -0.80895 3.81986 3.92837  
H -0.21698 4.03435 4.66765  
H -1.72870 3.98926 4.24244  
H 0.07363 -0.72255 3.49416  
H 7.66897 -0.63622 1.42080  
H 9.18954 -3.57939 -1.92622  
H 8.29984 -2.46213 -3.40320  
H 1.59715 7.36192 -4.48860

freeTSMn.log - Transition structure with Mn. No  
bonds fixed

C-N = 2.27 Å

C-O = 2.38 Å

B3LYP/6-31G\* Lan12DZ Mn

Free Energy = -6769.088921

Zero-point Energy = -6768.934608

Potential Energy = -6770.24007644

Nimag = 1 (-198.4577 cm-1)

Charge = 0 Multiplicity = 1

C 5.99020 2.37355 -3.66551

N 5.36582 2.45176 -2.34818

C 6.01600 2.23946 -1.21699

N 7.32247 1.82812 -1.26093

N 5.45508 2.49620 -0.02053

C -3.33160 6.05514 -1.58227

N -1.98219 5.60355 -1.31096

C -1.67710 4.71176 -0.36792

N -0.40986 4.30569 -0.22633

N -2.62432 4.26361 0.48713

C -7.75572 -6.37769 -2.58434

C -6.98426 -5.08731 -2.31799

|   |          |          |          |   |          |          |          |
|---|----------|----------|----------|---|----------|----------|----------|
| O | -7.68187 | -4.07399 | -1.98758 | O | -7.28414 | -1.49604 | -2.20701 |
| O | -5.73475 | -5.10744 | -2.46167 | C | -5.87112 | 0.39978  | -2.35367 |
| C | -2.69174 | -4.79291 | -1.68841 | O | -6.31803 | 1.13620  | -1.22242 |
| N | -3.75179 | -3.83520 | -1.29194 | N | -4.50880 | 0.87341  | -2.70029 |
| C | 1.88377  | 6.26538  | -4.25521 | C | -3.26173 | 0.28529  | -2.69652 |
| C | 0.79075  | 5.87052  | -3.26561 | C | -2.36100 | 1.33246  | -2.93173 |
| O | -0.14903 | 6.66237  | -3.05124 | N | -3.01567 | 2.53538  | -3.08092 |
| O | 0.91320  | 4.71911  | -2.70066 | C | -4.27807 | 2.21597  | -2.93748 |
| O | 9.48104  | -2.81673 | -2.35636 | N | -2.91250 | -1.01327 | -2.52712 |
| O | 6.61463  | -0.62691 | 0.99142  | C | -1.60055 | -1.18464 | -2.55657 |
| O | -8.29575 | -0.06384 | -4.41399 | N | -0.62649 | -0.26956 | -2.71249 |
| O | 5.09580  | -3.71763 | 3.07516  | C | -0.97605 | 1.03782  | -2.90932 |
| O | -8.52565 | -3.05818 | 0.34885  | N | -0.03683 | 1.97778  | -3.04288 |
| O | 7.94087  | -4.77773 | -1.22198 | O | 7.30089  | -2.28122 | -3.75215 |
| O | 6.29482  | -3.45859 | 0.72152  | P | 6.36935  | -1.89449 | -2.51690 |
| O | 2.65699  | 2.81318  | -2.28784 | O | 7.15803  | -0.99536 | -1.54435 |
| O | -3.16684 | 3.81626  | 4.60178  | O | 5.64605  | -3.08246 | -1.89734 |
| O | -1.68419 | 1.60445  | 5.00826  | O | 5.26041  | -0.93953 | -3.27109 |
| O | -4.11639 | -3.84922 | 1.42009  | C | 3.88794  | -1.30968 | -3.28667 |
| O | 0.36117  | -3.56220 | 3.91294  | C | 3.23480  | -1.08344 | -1.91362 |
| O | 2.49837  | -3.46939 | 2.35714  | O | 2.15005  | -0.08590 | -2.03059 |
| O | -2.26198 | 1.91438  | 2.07909  | C | 2.60286  | -2.27937 | -1.17950 |
| P | -3.58279 | 1.20543  | 2.40386  | O | 3.32681  | -2.50416 | 0.03290  |
| O | -4.37292 | 1.68303  | 3.59377  | C | 1.14833  | -1.83784 | -0.84925 |
| O | -3.25479 | -0.39684 | 2.62212  | O | 0.86712  | -2.05681 | 0.50979  |
| P | -1.89194 | -1.24804 | 2.33937  | C | 1.13759  | -0.38565 | -1.28640 |
| O | -1.45817 | -1.14446 | 0.88793  | O | 2.34937  | 0.19197  | 0.68141  |
| O | -0.84574 | -0.37646 | 3.29079  | P | 2.05618  | 1.61994  | 1.27467  |
| O | -2.06558 | -2.61560 | 2.95188  | O | 2.69328  | 2.72867  | 0.46443  |
| O | -4.46519 | 1.24311  | 1.05535  | O | 0.56323  | 1.83652  | 1.60877  |
| C | -5.88975 | 0.98722  | 1.16794  | O | 2.85518  | 1.54086  | 2.73683  |
| C | -6.40354 | 0.28226  | -0.06844 | P | 2.15265  | 0.69243  | 3.93319  |
| C | -5.65351 | -1.00347 | -0.45289 | O | 1.67989  | -0.67854 | 3.36186  |
| O | -5.99073 | -2.12506 | 0.32190  | O | 1.03356  | 1.49754  | 4.55180  |
| C | -5.95626 | -1.08353 | -1.96976 | O | 3.37842  | 0.45850  | 4.93440  |

|                              |                              |
|------------------------------|------------------------------|
| Mn -0.60599 1.67512 3.24436  | H 6.53312 -2.52314 0.90143   |
| H 5.39687 2.97942 -4.35386   | H 2.53034 2.77449 -1.30988   |
| H 6.01553 1.34133 -4.03015   | H 2.18001 3.65186 -2.55677   |
| H 4.33884 2.64540 -2.32126   | H -3.68515 4.30438 5.25880   |
| H 7.75613 1.77130 -0.34768   | H -3.79248 3.18616 4.14070   |
| H 7.46790 0.95873 -1.78563   | H -2.36247 2.32070 5.06633   |
| H 4.45478 2.73952 0.06740    | H -2.14758 0.75570 5.10039   |
| H 5.79797 1.93956 0.75271    | H -4.81937 -3.16781 1.37362  |
| H -3.98173 5.23200 -1.90836  | H -3.42294 -3.49742 2.02153  |
| H -3.27601 6.78155 -2.39493  | H -0.54250 -3.38454 3.54752  |
| H -1.22707 5.96776 -1.93786  | H 0.53327 -2.80362 4.49361   |
| H -0.16250 3.59942 0.46239   | H 3.27384 -3.74123 2.89452   |
| H 0.23593 4.50242 -1.00314   | H 1.65934 -3.60159 2.90293   |
| H -3.58990 4.39252 0.22482   | H -6.09854 0.35507 2.03578   |
| H -2.43303 3.41586 1.02811   | H -6.39661 1.94688 1.30599   |
| H -8.40598 -6.23721 -3.45535 | H -7.46052 0.03687 0.10901   |
| H -8.40770 -6.60731 -1.73440 | H -4.57961 -0.84339 -0.31125 |
| H -2.58122 -4.78714 -2.77448 | H -6.96134 -2.35046 0.26470  |
| H -1.74779 -4.52716 -1.20582 | H -5.24282 -1.69903 -2.52249 |
| H -3.84998 -3.81304 -0.23750 | H -7.32951 -2.50064 -2.17087 |
| H -4.67640 -4.17386 -1.72539 | H -6.52358 0.62785 -3.20029  |
| H -3.55309 -2.88176 -1.62948 | H -5.10720 2.90883 -2.98539  |
| H 1.97617 5.50071 -5.03498   | H -1.25758 -2.20965 -2.43735 |
| H 2.84882 6.31935 -3.73720   | H -0.27898 2.96684 -3.06220  |
| H 9.21423 -2.07650 -1.78296  | H 3.40595 -0.65666 -4.01856  |
| H 6.75672 -0.73160 -0.01144  | H 3.77254 -2.34927 -3.60675  |
| H -9.04883 0.39344 -4.01015  | H 3.95061 -0.60198 -1.24721  |
| H -8.05148 -0.73197 -3.73845 | H 2.63612 -3.18663 -1.78504  |
| H 5.66890 -4.17256 3.71016   | H 3.10372 -3.39228 0.38189   |
| H 5.51518 -3.81519 2.16952   | H 0.43849 -2.39171 -1.46906  |
| H -8.45816 -3.75650 1.01872  | H -0.08996 -1.70356 0.70339  |
| H -8.43372 -3.53546 -0.51408 | H 0.51829 0.39676 -0.88065   |
| H 7.15637 -4.56076 -1.76341  | H 7.00796 2.77029 -3.62256   |
| H 7.65756 -4.45678 -0.34292  | H -3.78291 6.54903 -0.71126  |
| H 5.84924 -3.38410 -0.16815  | H -7.07786 -7.21368 -2.76833 |



H -2.99640 -5.79013 -1.36878  
Mn 2.50790 -1.49507 1.67823  
O 4.38417 -1.11935 2.71543  
H 4.72597 -2.00794 2.99279  
H 5.05939 -0.78146 2.08310  
H 0.96204 1.80148 -2.93983  
H 4.02973 -0.08566 4.43750  
O -0.56395 3.71850 3.50270  
H 0.08762 3.88559 4.20560  
H -1.44480 3.99934 3.84428  
H 0.12181 -0.69305 3.29779  
H 7.50135 -0.51061 1.36793  
H 9.09300 -3.61323 -1.90576  
H 8.22226 -2.52032 -3.41609  
H 1.66443 7.23194 -4.71264

**pocketrafcutcut14.log**

fixed bonds at

C-N = 2.9

C-O = 1.4

B3LYP/6-31G\* Lanl2DZ Mg

Zero-point correction= 1.305334  
(Hartree/Particle)

Thermal correction to Energy=  
1.417149

Thermal correction to Enthalpy=  
1.418094

Thermal correction to Gibbs Free Energy=  
1.149400

Sum of electronic and zero-point Energies= -  
6563.173805

Sum of electronic and thermal Energies= -  
6563.061989

Sum of electronic and thermal Enthalpies= -  
6563.061045

Sum of electronic and thermal Free Energies=  
-6563.329739

|       | E (Thermal)<br>KCal/Mol<br>Cal/Mol-Kelvin | CV<br>Cal/Mol-Kelvin | S |
|-------|-------------------------------------------|----------------------|---|
| Total | 889.275                                   | 406.194              |   |

C,0,-6.0980201217,5.1078923051,-1.6956588565  
N,0,-5.4904213768,3.8149741672,-1.9568600753  
C,0,-6.0434830118,2.6555622119,-1.6054424761  
N,0,-7.2627432202,2.6080797228,-1.012364787  
N,0,-5.4157768765,1.5053703652,-1.8787131615  
C,0,3.9262370916,4.2366170308,-3.7770063974  
N,0,2.5418712012,3.9203098956,-3.4898191004  
C,0,2.0909508088,2.6794302063,-3.3128875372  
N,0,0.7936694952,2.480906713,-3.0502903007  
N,0,2.9194017828,1.6213931674,-3.4556069857  
C,0,7.5772068091,-1.0565153302,6.8900674852  
C,0,6.8632403843,-0.6136002522,5.6136576744  
O,0,7.6140782556,-0.3600174184,4.6148385684  
O,0,5.6113786555,-0.5132606515,5.6424133604  
C,0,2.5648360782,-1.0253843118,5.0166423266  
N,0,3.6047127313,-0.923670143,3.9637904029  
C,0,-1.3805134623,6.9529756033,-3.0668490735  
C,0,-0.330977395,5.8518289908,-2.9340983323  
O,0,0.814021306,6.0493347745,-3.3816820434  
O,0,-0.7241619663,4.7625272219,-2.3565843274  
O,0,-7.3498676839,1.3730777929,5.6479954578  
O,0,-6.4308071901,-1.1969001815,-0.9982514579  
O,0,8.2080144211,3.7027768621,2.2923021782  
O,0,-5.5623135195,-4.6635791122,1.6579732987  
O,0,8.4237630506,-1.9142082015,2.5794129476  
O,0,-6.1975356483,-1.0720239921,5.511705245

O,0,-7.1248419845,-2.9309833653,3.0490567547  
O,0,-3.1143159796,3.8874154673,-3.2681735391  
O,0,3.446044046,-3.2557886177,-5.4538893422  
O,0,5.614484081,-1.5694040971,-5.1242587338  
O,0,3.9510256477,-3.2854912282,2.5853046517  
O,0,-0.3853847145,-5.4878531083,1.7266319236  
O,0,-2.7452052778,-4.3344619789,1.5793418407  
O,0,2.3291276504,-1.1536394449,-2.7101056211  
P,0,3.5801203079,-1.7668885419,-2.0760044139  
O,0,4.429763735,-2.7134248171,-2.8819020548  
O,0,3.1132170887,-2.545988767,-0.7025927713  
P,0,1.6360359835,-2.773437769,-0.0634542827  
O,0,1.0445273244,-1.480330481,0.453004996  
O,0,0.8091054542,-3.1983484626,-1.4595852136  
O,0,1.7159049451,-3.9647638736,0.8581883072  
O,0,4.4345755425,-0.5159718519,-1.5371071037  
C,0,5.8597031768,-0.6436840733,-1.3201601083  
C,0,6.2726037349,0.1539856117,-0.1045536611  
C,0,5.5364890396,-0.2000116964,1.1935911504  
O,0,5.885435382,-1.4380793045,1.7596060487  
C,0,5.8147704126,1.0723073314,2.0314283365  
O,0,7.1490951586,1.1026558701,2.4918806654  
C,0,5.6740827667,2.1630965486,0.9549106079  
O,0,6.0040605463,1.5499405902,-0.2978565852  
N,0,4.338992357,2.7678251784,0.8540634236  
C,0,3.0814904073,2.3322788668,1.232169261  
C,0,2.1836178712,3.2221850454,0.6208263623  
N,0,2.853999796,4.1856847218,-0.1089668641  
C,0,4.1143365604,3.8783115538,0.0563621332  
N,0,2.7331920216,1.3127237196,2.0448834875  
C,0,1.4102134652,1.2176501094,2.1817061936  
N,0,0.4447607096,1.9633907102,1.6384367933  
C,0,0.8022626519,2.9971642671,0.8343061113  
N,0,-0.1819898898,3.7415657964,0.2926746172  
O,0,-8.0662454466,1.1036129072,3.1278158951

P,0,-6.8814849079,0.6884440445,2.1627186469  
O,0,-7.4653405641,0.3825817042,0.7919186925  
O,0,-6.0437748485,-0.4612185476,2.7841289699  
O,0,-5.9570797849,2.0234385919,2.0565404533  
C,0,-4.5261763453,2.1111870166,2.163518174  
C,0,-3.7880274688,1.0661902762,1.3182296531  
O,0,-2.6731225813,1.6676983171,0.6264364657  
C,0,-3.1885445774,-0.1429809948,2.082057248  
O,0,-3.8594435276,-1.3535071464,1.7123688597  
C,0,-1.7327619603,-0.2090542757,1.5924987309  
O,0,-1.3343439633,-1.5542337475,1.4089690009  
C,0,-1.7879970364,0.6168669156,0.295230448  
O,0,-2.3363703861,-0.2305619728,-0.674899324  
P,0,-2.075596858,-0.0994387403,-2.3014659604  
O,0,-2.7534920758,1.1014126612,-2.8728653317  
O,0,-0.5976452827,-0.341624107,-2.5968434484  
O,0,-2.925534097,-1.4516415599,-2.6968970536  
P,0,-2.2761296307,-2.9584862707,-2.5992841877  
O,0,-1.8613562887,-3.190630231,-1.1322750753  
O,0,-1.1320690516,-3.0803208759,-3.5733293991  
O,0,-3.5295350877,-3.8738330371,-2.960474078  
Mg,0,0.5500105362,-1.9082989677,-  
3.1559438116  
H,0,-5.4319244143,5.8720989037,-2.0995775759  
H,0,-6.2218443189,5.2983715276,-0.620646525  
H,0,-4.560249139,3.811556915,-2.4456109441  
H,0,-7.4557000776,1.7997756796,-0.4066617822  
H,0,-7.6315694922,3.4795265038,-0.659433776  
H,0,-4.4747647641,1.4849699553,-2.2836290162  
H,0,-5.8385206889,0.6074838438,-1.6511495659  
H,0,4.5960113773,3.9487356215,-2.9546434337  
H,0,3.9974204442,5.3177896295,-3.9069696009  
H,0,1.8696535046,4.7137152952,-3.3816090228  
H,0,0.4358031243,1.5441120577,-2.8981570405  
H,0,0.1882496581,3.2964832103,-2.8496284181  
H,0,3.9137231012,1.7796079791,-3.3892598943

H,0,2.6206109377,0.6965836228,-3.1456383079  
H,0,6.8627939265,-1.3003726801,7.6790357891  
H,0,8.2422313057,-0.2553729899,7.2316833693  
H,0,2.4491913391,-0.0573657466,5.5070023071  
H,0,1.6164415689,-1.3414897654,4.5765763829  
H,0,3.6938666742,-1.8336371122,3.4370825525  
H,0,4.5338668387,-0.7084629937,4.4440624401  
H,0,3.3943266488,-0.1712632587,3.2835766395  
H,0,-1.7558905282,7.2297300124,-2.0744560073  
H,0,-2.2316157404,6.5756050352,-3.6459612181  
H,0,-8.1246566201,1.4474423428,6.2254856432  
H,0,-6.86980754,-0.6935355469,-0.2430400631  
H,0,8.9424345064,3.5274620682,1.6847241513  
H,0,7.9230388272,2.8024331817,2.5591032021  
H,0,-6.0515503186,-5.4922452789,1.5402631787  
H,0,-6.1395298361,-4.078953305,2.2264962201  
H,0,8.3303791203,-2.8338578269,2.8734427878  
H,0,8.3305195222,-1.3823726577,3.4104140532  
H,0,-5.8946858945,-0.8225851527,4.6120623253  
H,0,-6.7716180548,-1.8368833604,5.3416566674  
H,0,-6.7283980334,-2.0252431814,2.9519942484  
H,0,-8.0184540975,-2.8444787036,2.6826244018  
H,0,-2.8599571476,2.9622063005,-3.4433165675  
H,0,-2.3103450006,4.2686876005,-2.8198374967  
H,0,4.121866338,-2.5747703652,-5.68342255  
H,0,3.6881272903,-3.4302422485,-4.5186221471  
H,0,6.4220932333,-2.0422856307,-5.3786635862  
H,0,5.3951932423,-1.9098521615,-4.2272926351  
H,0,4.6477371127,-2.8938794457,2.0187884473  
H,0,3.2452522209,-3.6147778827,1.9894443201  
H,0,0.3723314735,-4.874897727,1.5321258012  
H,0,-0.2710296005,-6.2034241365,1.0828289218  
H,0,-3.5311823054,-4.7809736372,1.9387804815  
H,0,-1.8880366817,-4.8468071109,1.7197218588  
H,0,6.134505727,-1.6901102234,-1.1597457203  
H,0,6.3671618647,-0.2810008265,-2.2202350267  
H,0,7.3526457476,0.000130303,0.0414542214  
H,0,4.4656632505,-0.2509358575,0.9781754025  
H,0,6.853113836,-1.4924315167,1.9928962368  
H,0,5.1097009871,1.2153346482,2.8537451656  
H,0,7.2216183104,0.5667924087,3.341600915  
H,0,6.3775297628,2.9786030466,1.1425231253  
H,0,4.9502135424,4.4222026428,-0.364001218  
H,0,1.0648672641,0.4039459365,2.8169092241  
H,0,-0.041051236,4.3027618809,-0.5492567  
H,0,-4.2733321686,3.1070488638,1.7925521878  
H,0,-4.2386762669,2.0524949788,3.2190107418  
H,0,-4.4838186387,0.6873008635,0.5624924556  
H,0,-3.2528971974,-0.0280923503,3.1671621268  
H,0,-4.8012588502,-1.2050741257,2.0087369883  
H,0,-1.0802184792,0.3147130118,2.2886109634  
H,0,-0.3685092969,-1.560717581,1.0642128624  
H,0,-0.8413471224,1.0421010626,-0.0203912815  
H,0,-7.072163369,5.2106165818,-2.1910654732  
H,0,4.2705540418,3.7541655048,-4.7010957385  
H,0,8.209613962,-1.9269235281,6.6815630052  
H,0,2.8936799874,-1.7599203947,5.7526288002  
Mg,0,-2.8349384747,-2.6506623147,0.506072891  
O,0,-4.6831017771,-3.1764832997,-0.4388181413  
H,0,-5.1269321101,-3.789473452,0.207414137  
H,0,-5.3269150455,-2.435981259,-0.6329003176  
H,0,-1.1282570899,3.4178088012,0.4557949894  
H,0,-4.1304730546,-3.8715768738,-2.1768904158  
O,0,1.0624888235,-2.3289919199,-5.0545166764  
H,0,0.4362837473,-2.9210538199,-5.4989720975  
H,0,2.0082399852,-2.633316326,-5.2909542393  
H,0,-0.124573806,-3.4515274151,-1.230922372  
H,0,-7.145993498,-1.4782036755,-1.5903531652  
H,0,-6.9810569822,0.4620018795,5.7951420347  
H,0,-7.7935870998,1.2928724835,4.0837161254

H,0,-0.9616687006,7.8331811846,-3.5581400043

C,0,1.6139740455,1.3852937801,-3.8463462141

N,0,0.3714487258,1.0132459512,-3.4898050434

N,0,2.6272920074,0.5025405859,-3.7155688463

**pocketrafcutcut17.log**

C,0,8.420420419,0.7476702584,6.0938427344

C,0,7.583464168,0.8016335018,4.817166829

fixed bonds at

O,0,8.2256393803,0.6834101898,3.7227305279

C-N = 2.65

O,0,6.344128513,0.9794139025,4.9315814214

C-O = 1.70

C,0,3.2388301307,0.3903622094,4.8354506604

N,0,4.1621104147,0.1258018302,3.7053223564

B3LYP/6-31G\* Lanl2DZ Mg

C,0,-1.2365375193,6.3515654785,-4.1788404966

C,0,-0.1586691154,5.2805885635,-4.3415462882

Zero-point correction= 1.306527 (Hartree/Particle)

O,0,0.7838147073,5.4442580162,-5.116584616

Thermal correction to Energy=1.418292

O,0,-0.3192104574,4.2075228365,-3.6044838928

Thermal correction to Enthalpy=1.419236

O,0,-9.733370943,1.9928908353,3.0792943959

Thermal correction to Gibbs Free Energy=  
1.152773

O,0,-6.7210865836,-1.3594109708,0.7537397582

O,0,8.5707614972,3.8364672504,0.2348052159

Sum of electronic and zero-point Energies= -  
6563.141265

O,0,-5.1740601583,-3.5822300745,3.5252959278

O,0,8.8055460128,-1.4353484652,2.1768116833

Sum of electronic and thermal Energies= -  
6563.029500

O,0,-8.2237247636,0.6574701315,4.8676807307

Sum of electronic and thermal Enthalpies=-  
6563.028556

O,0,-6.6112176951,-1.3457952961,3.5074626726

O,0,-2.6483982345,3.1105204249,-3.117971978

Sum of electronic and thermal Free Energies= -  
6563.295019

O,0,2.9086191749,-4.3134508623,-4.6778919341

O,0,1.2850350522,-5.0197950505,-2.6389916447

O,0,4.3824840006,-2.5458987554,3.105936698

E (Thermal) CV S

KCal/Mol Cal/Mol-Kelvin

Cal/Mol-Kelvin

O,0,-0.1841899363,-4.4924302884,3.3692000624

O,0,-2.4779780161,-3.1586383273,3.2040789491

Total 889.992 407.893  
560.820

O,0,2.085010092,-2.061300738,-2.3961660718

P,0,3.4099424632,-2.5119898562,-1.7796821893

O,0,4.1449701766,-3.6529378645,-2.4311713761

O,0,3.1337170254,-2.9107797106,-0.2026509129

P,0,1.782000727,-2.8381847365,0.7063343456

O,0,1.3071180418,-1.4125504883,0.9048381967

O,0,0.7442043829,-3.6198342634,-0.3285360718

O,0,2.0136548455,-3.6937979078,1.9299309477

O,0,4.3134549558,-1.1830418003,-1.6831740873

C,0,-6.0534120239,4.3388881671,-1.4237117835

N,0,-5.2651018425,3.4460750444,-2.267387414

C,0,-5.6100189184,2.2104479585,-2.6127000589

N,0,-6.654587393,1.5880657084,-2.0304986226

N,0,-4.9527263742,1.5995360687,-3.6325167849

C,0,3.056080565,3.0695001063,-4.9204207208

N,0,1.8050328777,2.5924279322,-4.3592329119

C,0,5.7553313619,-1.2839743041,-1.6286468659  
C,0,6.3161210422,-0.1723424349,-0.7719410402  
C,0,5.773690308,-0.1046378062,0.6606324155  
O,0,6.2004461081,-1.1363825033,1.5126960258  
C,0,6.1656765724,1.3438526107,1.0429887837  
O,0,7.5475678445,1.4466204241,1.3127624018  
C,0,5.8954638766,2.0842332221,-0.2812526992  
O,0,5.989586961,1.1091789045,-1.3304364503  
N,0,4.5891077491,2.7469798049,-0.3723653778  
C,0,3.3649271021,2.4569680704,0.2019452576  
C,0,2.4249738046,3.1975320032,-0.5284791111  
N,0,3.0383456101,3.9410059296,-1.5183966942  
C,0,4.3061940536,3.6443565498,-1.3906711898  
N,0,3.080000498,1.6772181626,1.265766392  
C,0,1.7733735028,1.6415755454,1.5180441442  
N,0,0.7599258758,2.2411814366,0.8789135189  
C,0,1.0616796591,3.0528216296,-0.171164902  
N,0,0.0569927898,3.6680581292,-0.8201972061  
O,0,-7.5543663047,3.2073380037,2.2038004213  
P,0,-6.4532982081,2.0846043724,1.9659876043  
O,0,-6.8194301933,1.2147214751,0.7472017653  
O,0,-6.0572930337,1.3142037834,3.2191318091  
O,0,-5.2014738956,3.055449299,1.5182717663  
C,0,-3.915596834,2.8103709174,2.0763518733  
C,0,-3.3081003948,1.497100744,1.5645718607  
O,0,-2.2843934597,1.7654233381,0.551361042  
C,0,-2.6185789354,0.5911730591,2.6049525793  
O,0,-3.3665269033,-0.6345210219,2.7135637005  
C,0,-1.2196024743,0.3056570926,2.0054612963  
O,0,-0.8765716719,-1.050502132,2.1704184723  
C,0,-1.4073867151,0.7459845559,0.5590372887  
O,0,-2.2237785355,-0.6165305888,-0.046814852  
P,0,-2.1179680207,-0.8785620136,-1.6658447061  
O,0,-2.7337931624,0.2480118297,-2.4323871663  
O,0,-0.7095207205,-1.3431569699,-2.0290700906

O,0,-3.0964010769,-2.213131736,-1.6969094692  
P,0,-2.4577396428,-3.6762743568,-1.2879744063  
O,0,-1.8616999051,-3.5135722493,0.1343377121  
O,0,-1.4717977548,-4.131086124,-2.3288810586  
O,0,-3.77244076,-4.5772044364,-1.2174282618  
Mg,0,0.3459649932,-3.0983404747,-  
2.4381713608  
H,0,-5.8778945153,5.3663478441,-1.7531436965  
H,0,-5.784776257,4.2427930965,-0.3683007072  
H,0,-4.2994125272,3.6936608854,-2.5251524621  
H,0,-6.8994008241,0.6902648631,-2.42595013  
H,0,-6.7954384228,1.6725450203,-1.0100792432  
H,0,-4.1447159463,2.1350597445,-3.9614247769  
H,0,-4.665895471,0.6435988068,-3.4337617273  
H,0,3.8323966328,3.1894025361,-4.15502571  
H,0,2.838288573,4.047937303,-5.350785768  
H,0,1.046224466,3.2867969311,-4.2024393631  
H,0,0.176238771,0.1269534723,-3.0279190202  
H,0,-0.4114739717,1.5954361147,-3.7508948485  
H,0,3.5527458548,0.8729122139,-3.5429927286  
H,0,2.4315357259,-0.3861939622,-3.2503690075  
H,0,7.7877653718,0.7734499862,6.9835266371  
H,0,9.1096342721,1.5996418689,6.1115925368  
H,0,3.162658236,1.4670484159,4.997627249  
H,0,2.2538376151,-0.0304629098,4.6203123917  
H,0,4.2002966053,-0.9072273328,3.48406235  
H,0,5.136489882,0.454469047,3.9970920349  
H,0,3.8770606776,0.6323462378,2.8485875195  
H,0,-1.264881813,6.6986949734,-3.1391584094  
H,0,-2.2241424142,5.9330221917,-4.4077294325  
H,0,-10.0354079776,1.3482892622,2.4218148741  
H,0,-6.7106738001,-0.3353346344,0.7396396951  
H,0,9.2562521667,3.4876142876,-0.3548036226  
H,0,8.3344552276,3.0600649052,0.7866323858  
H,0,-5.7626339744,-4.2869133619,3.8365640779  
H,0,-5.6642259696,-2.7160575056,3.6861145906

H,0,8.7436271593,-2.2275716534,2.7330237806  
H,0,8.8055666106,-0.6835410931,2.8216631084  
H,0,-7.4228091593,1.1394008169,4.5654148424  
H,0,-8.016788263,-0.2485586703,4.5678304913  
H,0,-6.1832080033,-0.4480094399,3.4711871449  
H,0,-6.8922852649,-1.4582811337,2.5695634289  
H,0,-2.4332454843,2.2754932833,-2.6604280546  
H,0,-1.7836072126,3.5938253471,-3.3124805865  
H,0,3.4582188769,-4.7828052924,-5.3228078769  
H,0,3.519227078,-3.9845125015,-3.9519932746  
H,0,1.9578864075,-5.0540909989,-3.3583041857  
H,0,1.7416478466,-5.2624915002,-1.8177159617  
H,0,5.0153791888,-2.3714094434,2.3782038583  
H,0,3.6212741269,-3.0308084781,2.7199301574  
H,0,0.6334254021,-4.1074783576,2.9547807872  
H,0,-0.223543459,-5.3903001216,3.0067360568  
H,0,-3.267861911,-3.6299592316,3.5385891614  
H,0,-1.6354694453,-3.6899196911,3.3537723362  
H,0,6.0610236843,-2.2436465239,-1.2025154074  
H,0,6.1377384019,-1.2183143348,-2.6522899802  
H,0,7.4091252793,-0.2987545264,-0.7379589056  
H,0,4.6832908027,-0.1730529795,0.6135840271  
H,0,7.1891805621,-1.14679671,1.6437005146  
H,0,5.5735842806,1.751306185,1.8668179381  
H,0,7.7157695339,1.1925076744,2.2733227983  
H,0,6.6499507893,2.8592844445,-0.4421844898  
H,0,5.1067253942,4.0476669361,-1.9978667  
H,0,1.4911612923,1.0122547648,2.3586361703  
H,0,0.1709574651,4.0528223399,-1.7647960651  
H,0,-3.2810263175,3.6478683152,1.774751689  
H,0,-3.9870143005,2.789952955,3.1675497743  
H,0,-4.0874428497,0.9129913878,1.0714837511  
H,0,-2.5639120812,1.0541311255,3.5921385027  
H,0,-3.0858249493,-1.0977464516,3.5269864973  
H,0,-0.48702332,0.9718123055,2.4581493607

H,0,0.0368494851,-1.2127958223,1.7176965893  
H,0,-0.5721178179,0.854834924,-0.1114178069  
H,0,-7.1148015533,4.1082581321,-1.5441073258  
H,0,3.4168892792,2.3889679683,-5.7000238161  
H,0,9.035592414,-0.1589457246,6.1013608698  
H,0,3.6513412314,-0.075633913,5.7310923155  
Mg,0,-2.5579863807,-  
2.1457537383,1.4063370025  
O,0,-4.5279105805,-2.8977282839,0.9890955206  
H,0,-4.8482929184,-3.3154264151,1.8329565572  
H,0,-5.2579888856,-2.2618886114,0.7466095102  
H,0,-0.8870982365,3.448992613,-0.5298483005  
H,0,-4.3023194824,-4.2375103844,-0.4583741359  
O,0,0.3984570706,-3.1187010531,-4.5361024287  
H,0,-0.2261543217,-3.7694741408,-4.8950362996  
H,0,1.2999229896,-3.4121831824,-4.8137866145  
H,0,-0.1818369604,-3.6890276992,0.0398155421  
H,0,-7.444665771,-1.6311562642,0.1688896818  
H,0,-9.3172793985,1.452526814,3.8095628536  
H,0,-8.4394096409,2.815104294,2.4922802448  
H,0,-1.0393873758,7.1986481165,-4.8387041889

### twofixCO19.log

fixed bonds at

C-N = 2.48

C-O = 1.90

B3LYP/6-31G\* Lanl2DZ Mg

Free Energy = -6563.284078

Zero-point Energy = -6563.127692

Potential Energy = -6564.43315859

Nimag = 1 (-314.5498 cm-1)

Charge = 0 Multiplicity = 1

C 6.16481 2.89172 -3.22129  
N 5.49938 2.77765 -1.92809  
C 6.10020 2.32089 -0.84159  
N 7.39449 1.87714 -0.92324  
N 5.50542 2.35943 0.36296  
C -3.44630 5.91450 -1.08506  
N -2.08166 5.49236 -0.84456  
C -1.74582 4.54431 0.03042  
N -0.45556 4.21739 0.18597  
N -2.68745 3.95771 0.80027  
C -7.74214 -5.99506 -3.19131  
C -6.97425 -4.73641 -2.79356  
O -7.67965 -3.75059 -2.40155  
O -5.72079 -4.75290 -2.89524  
C -2.69427 -4.57796 -1.97844  
N -3.76019 -3.65636 -1.51643  
C 1.81290 6.69264 -3.57601  
C 0.72830 6.13265 -2.65981  
O -0.27512 6.83152 -2.40980  
O 0.92244 4.94850 -2.19174  
O 9.46596 -2.77915 -2.78724  
O 6.77718 -0.78170 1.05183  
O -8.18316 0.49438 -4.40955  
O 5.16861 -4.13024 2.71799  
O -8.56064 -2.94853 0.00494  
O 7.81168 -4.74380 -1.82742  
O 6.35911 -3.57819 0.40417  
O 2.78351 3.12024 -1.90313  
O -3.39168 3.10907 5.28560  
O -1.69958 1.00173 5.39239  
O -4.20294 -3.91341 1.17455  
O 0.23142 -4.38829 3.26959  
O 2.54652 -3.70245 2.13557  
O -2.29272 1.65813 2.46335  
P -3.60337 0.89183 2.62805  
O -4.44243 1.14969 3.85100  
O -3.25671 -0.72148 2.57882  
P -1.85723 -1.50768 2.29870  
O -1.36022 -1.27115 0.88290  
O -0.88921 -0.70392 3.37285  
O -2.03977 -2.93681 2.75516  
O -4.44285 1.14128 1.27163  
C -5.87459 0.92480 1.28175  
C -6.33578 0.38072 -0.05243  
C -5.62038 -0.89011 -0.53046  
O -6.00637 -2.06741 0.13063  
C -5.88781 -0.82254 -2.05521  
O -7.22000 -1.17485 -2.35780  
C -5.74749 0.68710 -2.30813  
O -6.11509 1.34368 -1.09680  
N -4.38829 1.13185 -2.68257  
C -3.14533 0.54527 -2.57421  
C -2.22676 1.57621 -2.80580  
N -2.86759 2.77014 -3.05996  
C -4.13759 2.46042 -2.97648  
N -2.81606 -0.74426 -2.32651  
C -1.50743 -0.92156 -2.26385  
N -0.51823 -0.01908 -2.40955  
C -0.84548 1.28188 -2.68188  
N 0.10142 2.21738 -2.79438  
O 7.27291 -1.80509 -3.89576  
P 6.44944 -1.58544 -2.54728  
O 7.36224 -0.94867 -1.48448  
O 5.66075 -2.81780 -2.11676  
O 5.40239 -0.40953 -3.01629  
C 4.00706 -0.65330 -3.15740  
C 3.31452 -0.66582 -1.78760  
O 2.15791 0.24418 -1.81748  
C 2.77049 -1.99770 -1.23840  
O 3.49389 -2.35703 -0.05785

|    |          |          |          |   |          |          |          |
|----|----------|----------|----------|---|----------|----------|----------|
| C  | 1.27966  | -1.71051 | -0.89132 | H | 2.75721  | 6.77321  | -3.02447 |
| O  | 0.94724  | -2.19869 | 0.37823  | H | 9.33582  | -2.12736 | -2.07583 |
| C  | 1.18864  | -0.20135 | -1.06576 | H | 6.94913  | -0.80635 | 0.04440  |
| O  | 2.29214  | 0.10460  | 0.80065  | H | -8.94624 | 0.90302  | -3.97365 |
| P  | 2.07518  | 1.48965  | 1.51843  | H | -7.95221 | -0.24595 | -3.80839 |
| O  | 2.76375  | 2.64002  | 0.81408  | H | 5.74268  | -4.66908 | 3.28285  |
| O  | 0.60907  | 1.71767  | 1.91831  | H | 5.58386  | -4.11315 | 1.80584  |
| O  | 2.91684  | 1.22251  | 2.94915  | H | -8.51477 | -3.70945 | 0.60477  |
| P  | 2.20029  | 0.32621  | 4.10416  | H | -8.45474 | -3.34114 | -0.89799 |
| O  | 1.74716  | -1.01147 | 3.45322  | H | 7.01632  | -4.35176 | -2.24246 |
| O  | 1.08376  | 1.09380  | 4.76154  | H | 7.64734  | -4.55295 | -0.88440 |
| O  | 3.42471  | 0.04055  | 5.09913  | H | 5.92076  | -3.35471 | -0.46519 |
| Mg | -0.60094 | 1.48014  | 3.58624  | H | 6.65067  | -2.69274 | 0.70789  |
| H  | 5.58671  | 3.58535  | -3.83513 | H | 2.62730  | 2.96694  | -0.94149 |
| H  | 6.21390  | 1.92252  | -3.72975 | H | 2.26433  | 3.95045  | -2.10559 |
| H  | 4.47562  | 2.98514  | -1.90087 | H | -4.00400 | 3.53285  | 5.90475  |
| H  | 7.77027  | 1.58631  | -0.02915 | H | -3.93438 | 2.50317  | 4.69841  |
| H  | 7.54801  | 1.13760  | -1.61283 | H | -2.41406 | 1.64135  | 5.61391  |
| H  | 4.51149  | 2.62468  | 0.48023  | H | -2.11341 | 0.12608  | 5.34014  |
| H  | 5.83329  | 1.68639  | 1.04469  | H | -4.87063 | -3.19657 | 1.17605  |
| H  | -4.06251 | 5.10147  | -1.49167 | H | -3.49250 | -3.64223 | 1.79738  |
| H  | -3.41495 | 6.71488  | -1.82642 | H | -0.60761 | -3.94982 | 2.96931  |
| H  | -1.33463 | 5.95939  | -1.41076 | H | 0.25051  | -4.21373 | 4.22297  |
| H  | -0.18186 | 3.45348  | 0.79949  | H | 3.31061  | -4.12099 | 2.58362  |
| H  | 0.19691  | 4.53093  | -0.54636 | H | 1.68548  | -4.03231 | 2.53782  |
| H  | -3.65131 | 4.02225  | 0.50991  | H | -6.15336 | 0.21307  | 2.06383  |
| H  | -2.45353 | 3.11862  | 1.33662  | H | -6.36045 | 1.88199  | 1.49596  |
| H  | -7.06208 | -6.80484 | -3.46345 | H | -7.41360 | 0.17574  | 0.02755  |
| H  | -8.39967 | -5.76785 | -4.03790 | H | -4.54735 | -0.77293 | -0.35116 |
| H  | -2.52617 | -4.43579 | -3.04769 | H | -6.97884 | -2.26360 | 0.02485  |
| H  | -1.77361 | -4.39463 | -1.41892 | H | -5.17942 | -1.40875 | -2.64602 |
| H  | -3.89967 | -3.74900 | -0.47087 | H | -7.29129 | -2.17759 | -2.41738 |
| H  | -4.66992 | -3.92597 | -2.01897 | H | -6.41903 | 1.01183  | -3.10737 |
| H  | -3.53724 | -2.67279 | -1.73256 | H | -4.95904 | 3.15014  | -3.11847 |
| H  | 1.98402  | 6.00767  | -4.41430 | H | -1.18401 | -1.93612 | -2.05303 |



H -0.14556 3.20558 -2.81765  
H 3.61156 0.18653 -3.73358  
H 3.82612 -1.58025 -3.71019  
H 3.98273 -0.22772 -1.04615  
H 2.87721 -2.80071 -1.96839  
H 3.37356 -3.31239 0.09711  
H 0.65551 -2.17394 -1.65926  
H -0.01259 -1.88360 0.59983  
H 0.53107 0.47334 -0.54938  
H 7.17698 3.28503 -3.09219  
H -3.92145 6.30481 -0.17512  
H -8.38671 -6.31517 -2.36500  
H -3.02944 -5.60130 -1.80539  
Mg 2.55877 -1.66385 1.74486  
O 4.52552 -1.48208 2.64596  
H 4.85387 -2.39274 2.85639  
H 5.22974 -1.08945 2.07902  
H 1.08955 2.04419 -2.61608  
H 4.09039 -0.47552 4.59950  
O -0.81549 3.44693 4.27630  
H -0.22553 3.60397 5.03125  
H -1.73720 3.57762 4.60391  
H 0.05128 -1.04404 3.42444  
H 7.65401 -0.74396 1.46596  
H 9.03147 -3.59943 -2.43362  
H 8.18054 -2.18757 -3.67491  
H 1.53127 7.67612 -3.95689

### 218COCNfixed.log

Fixed bonds at

C-N = 2.18

C-O = 2.18

B3LYP/6-31G\* Lanl2DZ Mg

Free Energy = -6563.284078

Zero-point Energy = -6563.127692

Potential Energy = -6564.43315859

Nimag = 1 (-314.5498 cm-1)

Charge = 0 Multiplicity = 1

C 6.16481 2.89172 -3.22129

N 5.49938 2.77765 -1.92809

C 6.10020 2.32089 -0.84159

N 7.39449 1.87714 -0.92324

N 5.50542 2.35943 0.36296

C -3.44630 5.91450 -1.08506

N -2.08166 5.49236 -0.84456

C -1.74582 4.54431 0.03042

N -0.45556 4.21739 0.18597

N -2.68745 3.95771 0.80027

C -7.74214 -5.99506 -3.19131

C -6.97425 -4.73641 -2.79356

O -7.67965 -3.75059 -2.40155

O -5.72079 -4.75290 -2.89524

C -2.69427 -4.57796 -1.97844

N -3.76019 -3.65636 -1.51643

C 1.81290 6.69264 -3.57601

C 0.72830 6.13265 -2.65981

O -0.27512 6.83152 -2.40980

O 0.92244 4.94850 -2.19174

O 9.46596 -2.77915 -2.78724

O 6.77718 -0.78170 1.05183

O -8.18316 0.49438 -4.40955

O 5.16861 -4.13024 2.71799

O -8.56064 -2.94853 0.00494

O 7.81168 -4.74380 -1.82742

O 6.35911 -3.57819 0.40417

O 2.78351 3.12024 -1.90313

|   |          |          |          |    |          |          |          |
|---|----------|----------|----------|----|----------|----------|----------|
| O | -3.39168 | 3.10907  | 5.28560  | O  | 5.66075  | -2.81780 | -2.11676 |
| O | -1.69958 | 1.00173  | 5.39239  | O  | 5.40239  | -0.40953 | -3.01629 |
| O | -4.20294 | -3.91341 | 1.17455  | C  | 4.00706  | -0.65330 | -3.15740 |
| O | 0.23142  | -4.38829 | 3.26959  | C  | 3.31452  | -0.66582 | -1.78760 |
| O | 2.54652  | -3.70245 | 2.13557  | O  | 2.15791  | 0.24418  | -1.81748 |
| O | -2.29272 | 1.65813  | 2.46335  | C  | 2.77049  | -1.99770 | -1.23840 |
| P | -3.60337 | 0.89183  | 2.62805  | O  | 3.49389  | -2.35703 | -0.05785 |
| O | -4.44243 | 1.14969  | 3.85100  | C  | 1.27966  | -1.71051 | -0.89132 |
| O | -3.25671 | -0.72148 | 2.57882  | O  | 0.94724  | -2.19869 | 0.37823  |
| P | -1.85723 | -1.50768 | 2.29870  | C  | 1.18864  | -0.20135 | -1.06576 |
| O | -1.36022 | -1.27115 | 0.88290  | O  | 2.29214  | 0.10460  | 0.80065  |
| O | -0.88921 | -0.70392 | 3.37285  | P  | 2.07518  | 1.48965  | 1.51843  |
| O | -2.03977 | -2.93681 | 2.75516  | O  | 2.76375  | 2.64002  | 0.81408  |
| O | -4.44285 | 1.14128  | 1.27163  | O  | 0.60907  | 1.71767  | 1.91831  |
| C | -5.87459 | 0.92480  | 1.28175  | O  | 2.91684  | 1.22251  | 2.94915  |
| C | -6.33578 | 0.38072  | -0.05243 | P  | 2.20029  | 0.32621  | 4.10416  |
| C | -5.62038 | -0.89011 | -0.53046 | O  | 1.74716  | -1.01147 | 3.45322  |
| O | -6.00637 | -2.06741 | 0.13063  | O  | 1.08376  | 1.09380  | 4.76154  |
| C | -5.88781 | -0.82254 | -2.05521 | O  | 3.42471  | 0.04055  | 5.09913  |
| O | -7.22000 | -1.17485 | -2.35780 | Mg | -0.60094 | 1.48014  | 3.58624  |
| C | -5.74749 | 0.68710  | -2.30813 | H  | 5.58671  | 3.58535  | -3.83513 |
| O | -6.11509 | 1.34368  | -1.09680 | H  | 6.21390  | 1.92252  | -3.72975 |
| N | -4.38829 | 1.13185  | -2.68257 | H  | 4.47562  | 2.98514  | -1.90087 |
| C | -3.14533 | 0.54527  | -2.57421 | H  | 7.77027  | 1.58631  | -0.02915 |
| C | -2.22676 | 1.57621  | -2.80580 | H  | 7.54801  | 1.13760  | -1.61283 |
| N | -2.86759 | 2.77014  | -3.05996 | H  | 4.51149  | 2.62468  | 0.48023  |
| C | -4.13759 | 2.46042  | -2.97648 | H  | 5.83329  | 1.68639  | 1.04469  |
| N | -2.81606 | -0.74426 | -2.32651 | H  | -4.06251 | 5.10147  | -1.49167 |
| C | -1.50743 | -0.92156 | -2.26385 | H  | -3.41495 | 6.71488  | -1.82642 |
| N | -0.51823 | -0.01908 | -2.40955 | H  | -1.33463 | 5.95939  | -1.41076 |
| C | -0.84548 | 1.28188  | -2.68188 | H  | -0.18186 | 3.45348  | 0.79949  |
| N | 0.10142  | 2.21738  | -2.79438 | H  | 0.19691  | 4.53093  | -0.54636 |
| O | 7.27291  | -1.80509 | -3.89576 | H  | -3.65131 | 4.02225  | 0.50991  |
| P | 6.44944  | -1.58544 | -2.54728 | H  | -2.45353 | 3.11862  | 1.33662  |
| O | 7.36224  | -0.94867 | -1.48448 | H  | -7.06208 | -6.80484 | -3.46345 |

|   |          |          |          |    |          |          |          |
|---|----------|----------|----------|----|----------|----------|----------|
| H | -8.39967 | -5.76785 | -4.03790 | H  | -4.54735 | -0.77293 | -0.35116 |
| H | -2.52617 | -4.43579 | -3.04769 | H  | -6.97884 | -2.26360 | 0.02485  |
| H | -1.77361 | -4.39463 | -1.41892 | H  | -5.17942 | -1.40875 | -2.64602 |
| H | -3.89967 | -3.74900 | -0.47087 | H  | -7.29129 | -2.17759 | -2.41738 |
| H | -4.66992 | -3.92597 | -2.01897 | H  | -6.41903 | 1.01183  | -3.10737 |
| H | -3.53724 | -2.67279 | -1.73256 | H  | -4.95904 | 3.15014  | -3.11847 |
| H | 1.98402  | 6.00767  | -4.41430 | H  | -1.18401 | -1.93612 | -2.05303 |
| H | 2.75721  | 6.77321  | -3.02447 | H  | -0.14556 | 3.20558  | -2.81765 |
| H | 9.33582  | -2.12736 | -2.07583 | H  | 3.61156  | 0.18653  | -3.73358 |
| H | 6.94913  | -0.80635 | 0.04440  | H  | 3.82612  | -1.58025 | -3.71019 |
| H | -8.94624 | 0.90302  | -3.97365 | H  | 3.98273  | -0.22772 | -1.04615 |
| H | -7.95221 | -0.24595 | -3.80839 | H  | 2.87721  | -2.80071 | -1.96839 |
| H | 5.74268  | -4.66908 | 3.28285  | H  | 3.37356  | -3.31239 | 0.09711  |
| H | 5.58386  | -4.11315 | 1.80584  | H  | 0.65551  | -2.17394 | -1.65926 |
| H | -8.51477 | -3.70945 | 0.60477  | H  | -0.01259 | -1.88360 | 0.59983  |
| H | -8.45474 | -3.34114 | -0.89799 | H  | 0.53107  | 0.47334  | -0.54938 |
| H | 7.01632  | -4.35176 | -2.24246 | H  | 7.17698  | 3.28503  | -3.09219 |
| H | 7.64734  | -4.55295 | -0.88440 | H  | -3.92145 | 6.30481  | -0.17512 |
| H | 5.92076  | -3.35471 | -0.46519 | H  | -8.38671 | -6.31517 | -2.36500 |
| H | 6.65067  | -2.69274 | 0.70789  | H  | -3.02944 | -5.60130 | -1.80539 |
| H | 2.62730  | 2.96694  | -0.94149 | Mg | 2.55877  | -1.66385 | 1.74486  |
| H | 2.26433  | 3.95045  | -2.10559 | O  | 4.52552  | -1.48208 | 2.64596  |
| H | -4.00400 | 3.53285  | 5.90475  | H  | 4.85387  | -2.39274 | 2.85639  |
| H | -3.93438 | 2.50317  | 4.69841  | H  | 5.22974  | -1.08945 | 2.07902  |
| H | -2.41406 | 1.64135  | 5.61391  | H  | 1.08955  | 2.04419  | -2.61608 |
| H | -2.11341 | 0.12608  | 5.34014  | H  | 4.09039  | -0.47552 | 4.59950  |
| H | -4.87063 | -3.19657 | 1.17605  | O  | -0.81549 | 3.44693  | 4.27630  |
| H | -3.49250 | -3.64223 | 1.79738  | H  | -0.22553 | 3.60397  | 5.03125  |
| H | -0.60761 | -3.94982 | 2.96931  | H  | -1.73720 | 3.57762  | 4.60391  |
| H | 0.25051  | -4.21373 | 4.22297  | H  | 0.05128  | -1.04404 | 3.42444  |
| H | 3.31061  | -4.12099 | 2.58362  | H  | 7.65401  | -0.74396 | 1.46596  |
| H | 1.68548  | -4.03231 | 2.53782  | H  | 9.03147  | -3.59943 | -2.43362 |
| H | -6.15336 | 0.21307  | 2.06383  | H  | 8.18054  | -2.18757 | -3.67491 |
| H | -6.36045 | 1.88199  | 1.49596  | H  | 1.53127  | 7.67612  | -3.95689 |
| H | -7.41360 | 0.17574  | 0.02755  |    |          |          |          |

**twofixCO24.log**

fixed bonds at

C-N = 2.00

C-O = 2.40

B3LYP/6-31G\* Lanl2DZ Mg

Zero-point correction= 1.305798 (Hartree/Particle)

Thermal correction to Energy= 1.418694

Thermal correction to Enthalpy= 1.419638

Thermal correction to Gibbs Free Energy=1.150443

Sum of electronic and zero-point Energies=-6563.133223

Sum of electronic and thermal Energies= -6563.020328

Sum of electronic and thermal Enthalpies= -6563.019383

Sum of electronic and thermal Free Energies= -6563.288578

|         | E (Thermal)    | CV             | S |
|---------|----------------|----------------|---|
|         | KCal/Mol       | Cal/Mol-Kelvin |   |
|         | Cal/Mol-Kelvin |                |   |
| Total   | 890.244        | 410.368        |   |
| 566.569 |                |                |   |

C,0,6.1442185595,2.9043828187,-3.1743615118  
 N,0,5.4954688199,2.7886345749,-1.8729297386  
 C,0,6.1113921351,2.3344467173,-0.7925908652  
 N,0,7.4036361167,1.8887395254,-0.8934973178  
 N,0,5.5344414251,2.3802895754,0.419283942  
 C,0,-3.4683565739,5.8480008608,-1.0477911975  
 N,0,-2.0979554097,5.429580428,-0.8342057808  
 C,0,-1.7396129897,4.5062491298,0.0591880495  
 N,0,-0.4466871358,4.1835627235,0.1944918962  
 N,0,-2.6640539611,3.9380925468,0.8623537807

C,0,-7.8580367574,-5.9386967007,-3.0973283452  
 C,0,-7.0688743041,-4.6883848509,-2.7159380688  
 O,0,-7.758178602,-3.6820934859,-2.3474312781  
 O,0,-5.8151380182,-4.7307642433,-2.8074055707  
 C,0,-2.7834573325,-4.6260874354,-1.9179023552  
 N,0,-3.8235825471,-3.6812983372,-1.4436449267  
 C,0,1.7667698589,6.6580986692,-3.5936986983  
 C,0,0.6804933255,6.0857289798,-2.6873428441  
 O,0,-0.3344805402,6.7699783805,-2.4476216773  
 O,0,0.8878275907,4.9048475189,-2.213736835  
 O,0,9.4842225935,-2.7145327589,-2.8263760752  
 O,0,6.8350157289,-0.7877841045,1.0453372581  
 O,0,-8.1113008343,0.5315870523,-4.4370903811  
 O,0,5.2225501368,-4.1298179192,2.6838279422  
 O,0,-8.5980511152,-2.8217485758,0.0553588379  
 O,0,7.8599988413,-4.7093565939,-1.8699323636  
 O,0,6.4003644558,-3.5725929162,0.3650268528  
 O,0,2.7701176711,3.1118970652,-1.8022251267  
 O,0,-3.354719044,3.074780717,5.3287595844  
 O,0,-1.6614035581,0.96494705,5.4119279251  
 O,0,-4.2353710468,-3.8868352187,1.2510084707  
 O,0,0.3006193954,-4.3543918217,3.2695522098  
 O,0,2.6071522794,-3.6710703705,2.1019509661  
 O,0,-2.2473218632,1.6412562112,2.5013479066  
 P,0,-3.5605200269,0.8774817493,2.6549969553  
 O,0,-4.4155507976,1.1394009944,3.8654901596  
 O,0,-3.2153405322,-0.735149284,2.6114133921  
 P,0,-1.8179598245,-1.5238560712,2.3181277934  
 O,0,-1.332720876,-1.2811894718,0.8987936666  
 O,0,-0.8392538315,-0.7311374769,3.3859115159  
 O,0,-2.0096987655,-2.9550948904,2.7646718898  
 O,0,-4.3857076098,1.1289129056,1.2875926631  
 C,0,-5.8223713919,0.9566282206,1.289532262  
 C,0,-6.2918537953,0.4247926525,-0.0466828379  
 C,0,-5.6088370979,-0.8646939626,-0.5199470347

O,0,-6.014213914,-2.0310748194,0.1482090178  
C,0,-5.8793449107,-0.79850772,-2.0448009079  
O,0,-7.2180891792,-1.1243506645,-2.345064911  
C,0,-5.7106431252,0.7079089931,-2.3067994848  
O,0,-6.0345799841,1.3790445865,-1.0921522818  
N,0,-4.3494591641,1.1217364206,-2.7150266592  
C,0,-3.1149331375,0.5345582764,-2.5555906043  
C,0,-2.1837505329,1.5459098948,-2.8161102151  
N,0,-2.8082805853,2.7292442101,-3.1407748557  
C,0,-4.0827052827,2.4338980067,-3.0668465576  
N,0,-2.8060309065,-0.7450514332,-2.2302411232  
C,0,-1.5106319177,-0.9344453665,-2.1050896362  
N,0,-0.5157182159,-0.036534644,-2.2865171655  
C,0,-0.8069438277,1.2628713433,-2.6235370079  
N,0,0.1444919328,2.1855967809,-2.7295077356  
O,0,7.274349218,-1.7521138893,-3.9204335284  
P,0,6.4606113648,-1.5572251162,-2.5605431672  
O,0,7.3813222098,-0.9295697547,-1.4986300086  
O,0,5.6874357512,-2.8037567838,-2.1453844415  
O,0,5.4047080467,-0.378583333,-2.9976626586  
C,0,4.0130426896,-0.6254354585,-3.1709962506  
C,0,3.2879992525,-0.6400840142,-1.8180524356  
O,0,2.099436964,0.2118529516,-1.9002716571  
C,0,2.7868400377,-1.9877745488,-1.2672957065  
O,0,3.5228282946,-2.3284172289,-0.0911801489  
C,0,1.283497334,-1.7525059659,-0.9229936565  
O,0,0.990325639,-2.1806850483,0.3798485126  
C,0,1.1087674557,-0.2550466472,-1.1564261348  
O,0,2.401444468,0.1625400962,0.822110562  
P,0,2.1427093201,1.5104905651,1.5659349154  
O,0,2.8116728553,2.7055588082,0.910791457  
O,0,0.6643303818,1.7068993268,1.9558215096  
O,0,2.9624371009,1.2455431306,3.0198759603  
P,0,2.2416035872,0.3118175671,4.134107994  
O,0,1.7954110747,-1.0100872878,3.4435039256  
O,0,1.1134052175,1.0508571006,4.8068626146  
O,0,3.4535936749,-0.0036159849,5.1374977848  
Mg,0,-0.5475558134,1.4585477161,3.6148559983  
H,0,5.5563641749,3.5962424062,-3.7811486163  
H,0,6.1911962236,1.9353099082,-3.6833217527  
H,0,4.47127136,2.9851756155,-1.8330628531  
H,0,7.7923312476,1.597938572,-0.00495365  
H,0,7.5461844315,1.1492370979,-1.5862566711  
H,0,4.5407072834,2.6478517194,0.5508464271  
H,0,5.8708311957,1.7096731132,1.0990335158  
H,0,-4.0982580563,5.0254106956,-1.4132380909  
H,0,-3.4565819627,6.6268992669,-1.8121785228  
H,0,-1.3659838235,5.8926104843,-1.4224177776  
H,0,-0.153802644,3.439485922,0.8243498551  
H,0,0.1937304605,4.496315507,-0.5477232083  
H,0,-3.6336279615,3.9964277052,0.5901743426  
H,0,-2.419025675,3.1067242593,1.4066608967  
H,0,-7.1918629531,-6.7652855332,-3.3525111669  
H,0,-8.5074041895,-5.7132349975,-3.9506224141  
H,0,-2.623887827,-4.4875953335,-2.9888978407  
H,0,-1.8525495678,-4.4649937153,-1.3686090598  
H,0,-3.9536324,-3.7656161398,-0.3949683893  
H,0,-4.7453881678,-3.9293215445,-1.9362516635  
H,0,-3.5824154265,-2.7041973927,-1.6621285541  
H,0,1.9683074002,5.9660454065,-4.4191888336  
H,0,2.6991954409,6.767773026,-3.0270057548  
H,0,9.3364041616,-2.0669238701,-2.1143270566  
H,0,6.9871704576,-0.7996812149,0.035296345  
H,0,-8.894834079,0.9442376929,-4.04326167  
H,0,-7.9118406804,-0.2060674146,-3.8213721789  
H,0,5.7956710531,-4.6771697321,3.2412723841  
H,0,5.6315764735,-4.1105838029,1.7689697852  
H,0,-8.5852317226,-3.5748096792,0.6666309411  
H,0,-8.5100599152,-3.2310115279,-0.8420210204  
H,0,7.0627612776,-4.3320986252,-2.294313262

H,0,7.6835188788,-4.5131908436,-0.9298155951  
H,0,5.9555934968,-3.3435780511,-0.5002339161  
H,0,6.6928257163,-2.6892510386,0.6745479955  
H,0,2.6415652975,2.998811733,-0.8286985554  
H,0,2.2544368331,3.9341004503,-2.0346069843  
H,0,-3.9619584434,3.4840062224,5.962517931  
H,0,-3.9017037831,2.4822546231,4.7332543779  
H,0,-2.3861551233,1.592632166,5.6325747915  
H,0,-2.0562057072,0.0806200927,5.3619651036  
H,0,-4.8843397194,-3.1538823961,1.2528674929  
H,0,-3.5052566201,-3.6243996188,1.8557091442  
H,0,-0.5528655219,-3.943389556,2.9726691775  
H,0,0.3390847422,-4.1389847525,4.2140327088  
H,0,3.3682774785,-4.0945760959,2.5504195079  
H,0,1.7467838555,-3.9960093888,2.5064868411  
H,0,-6.1277354973,0.2546031442,2.0704242406  
H,0,-6.2821564159,1.9276769279,1.4996018776  
H,0,-7.3757354908,0.2517456602,0.0260431539  
H,0,-4.5333253937,-0.7673746736,-0.3450428669  
H,0,-6.9938110091,-2.1991627687,0.0604265279  
H,0,-5.1833007146,-1.4012999415,-2.6349467085  
H,0,-7.3171093001,-2.1265861012,-2.3833779694  
H,0,-6.3879887089,1.0421035535,-3.0974494256  
H,0,-4.8950865148,3.1225600002,-3.2578467262  
H,0,-1.1957023778,-1.9258824469,-1.805715524  
H,0,-0.0983609301,3.1752782401,-2.7989455453  
H,0,3.6289259364,0.2152726831,-3.7537155909  
H,0,3.8470776032,-1.5507974419,-3.731367129  
H,0,3.9227604961,-0.1699404838,-1.0663187429  
H,0,2.9174626963,-2.7860328641,-1.9990409858  
H,0,3.404318453,-3.2813510261,0.0807513469  
H,0,0.679885953,-2.2989242022,-1.6546413669  
H,0,0.0355814765,-1.8724299613,0.6128627424  
H,0,0.6257396429,0.391168789,-0.4418428099  
H,0,7.1564158951,3.3016587496,-3.0575784686

H,0,-3.9178274898,6.2647174352,-0.1365328251  
H,0,-8.512318298,-6.2331997342,-2.2690738097  
H,0,-3.1400823191,-5.6414926095,-1.7416008445  
Mg,0,2.6237485971,-1.6178781067,1.7217401642  
O,0,4.5842476926,-1.4761938353,2.6334263698  
H,0,4.9093965146,-2.3892815459,2.8352611095  
H,0,5.2913214062,-1.0794299532,2.0731821799  
H,0,1.1263821099,2.0244088679,-2.4966252543  
H,0,4.1297655441,-0.4968593993,4.6297340035  
O,0,-0.7691197987,3.4185397843,4.3266083204  
H,0,-0.175328972,3.5598277386,5.0818229296  
H,0,-1.6888214284,3.5430829293,4.6610141283  
H,0,0.1098090604,-1.0564660755,3.4163287267  
H,0,7.7198200831,-0.7616164274,1.4429429787  
H,0,9.0634165361,-3.5434555108,-2.4763494019  
H,0,8.1852397719,-2.1318026877,-3.7104288428  
H,0,1.4697357353,7.6301221504,-3.9918801095

#### Pocketrafcutcut26.log

Fixed bonds at

C-N = 1.73

C-O = 2.60

B3LYP/6-31G\* Lanl2DZ Mg

Zero-point correction=1.306299 (Hartree/Particle)

Thermal correction to Energy= 1.419023

Thermal correction to Enthalpy= 1.419968

Thermal correction to Gibbs Free  
Energy=1.150528

Sum of electronic and zero-point Energies=-  
6563.155811

Sum of electronic and thermal Energies= -  
6563.043087

Sum of electronic and thermal Enthalpies=-  
6563.042142

Sum of electronic and thermal Free Energies=-  
6563.311581

|       | E (Thermal) | CV             | S              |
|-------|-------------|----------------|----------------|
|       | KCal/Mol    | Cal/Mol-Kelvin | Cal/Mol-Kelvin |
| Total | 890.451     | 409.957        | 567.082        |
| C     | 6.13        | 2.93358        | -3.15529       |
| N     | 5.48111     | 2.8025         | -1.85538       |
| C     | 6.09652     | 2.33429        | -0.78075       |
| N     | 7.38825     | 1.88838        | -0.88717       |
| N     | 5.51962     | 2.36581        | 0.43161        |
| C     | -3.4792     | 5.86172        | -0.99237       |
| N     | -2.10928    | 5.43912        | -0.78399       |
| C     | -1.75199    | 4.5044         | 0.09792        |
| N     | -0.45944    | 4.17859        | 0.2292         |
| N     | -2.67709    | 3.92743        | 0.89401        |
| C     | -7.88239    | -5.89371       | -3.18737       |
| C     | -7.0918     | -4.64911       | -2.79057       |
| O     | -7.77995    | -3.64666       | -2.40965       |
| O     | -5.83811    | -4.69179       | -2.88257       |
| C     | -2.80631    | -4.6016        | -1.99188       |
| N     | -3.84535    | -3.66155       | -1.50597       |
| C     | 1.75686     | 6.69721        | -3.52814       |
| C     | 0.66993     | 6.11493        | -2.62892       |
| O     | -0.34426    | 6.79733        | -2.38074       |
| O     | 0.8759      | 4.92805        | -2.16994       |
| O     | 9.46355     | -2.69303       | -2.87682       |
| O     | 6.81655     | -0.81125       | 1.01844        |
| O     | -8.12823    | 0.59293        | -4.44706       |
| O     | 5.20025     | -4.17142       | 2.61553        |
| O     | -8.61884    | -2.81511       | 0.00361        |
| O     | 7.83704     | -4.69766       | -1.94509       |
| O     | 6.37871     | -3.58693       | 0.30377        |

|   |          |          |          |
|---|----------|----------|----------|
| O | 2.75614  | 3.12799  | -1.78065 |
| O | -3.36875 | 3.00977  | 5.34941  |
| O | -1.67785 | 0.89713  | 5.40648  |
| O | -4.25738 | -3.8999  | 1.18594  |
| O | 0.27807  | -4.39757 | 3.19849  |
| O | 2.58538  | -3.70252 | 2.0394   |
| O | -2.26299 | 1.61003  | 2.50449  |
| P | -3.57707 | 0.84592  | 2.6487   |
| O | -4.4318  | 1.09384  | 3.86235  |
| O | -3.23374 | -0.76644 | 2.58518  |
| P | -1.83726 | -1.55307 | 2.28215  |
| O | -1.35174 | -1.29343 | 0.86592  |
| O | -0.85765 | -0.77473 | 3.35964  |
| O | -2.03064 | -2.98949 | 2.71098  |
| O | -4.40196 | 1.11518  | 1.28452  |
| C | -5.83882 | 0.94453  | 1.28435  |
| C | -6.30891 | 0.42979  | -0.05833 |
| C | -5.62738 | -0.85453 | -0.54751 |
| O | -6.03409 | -2.02861 | 0.10619  |
| C | -5.89781 | -0.76919 | -2.07142 |
| O | -7.23692 | -1.08976 | -2.37567 |
| C | -5.72738 | 0.74016  | -2.31479 |
| O | -6.05054 | 1.3966   | -1.09193 |
| N | -4.36572 | 1.15743  | -2.71788 |
| C | -3.13187 | 0.56691  | -2.56573 |
| C | -2.19952 | 1.58034  | -2.81375 |
| N | -2.8227  | 2.76831  | -3.12375 |
| C | -4.09746 | 2.47354  | -3.05346 |
| N | -2.82443 | -0.71697 | -2.25623 |
| C | -1.52925 | -0.90938 | -2.13345 |
| N | -0.53331 | -0.01044 | -2.30377 |
| C | -0.82304 | 1.29336  | -2.6247  |
| N | 0.12945  | 2.21624  | -2.71928 |
| O | 7.09314  | -1.76358 | -4.20681 |
| P | 6.27963  | -1.58458 | -2.84461 |

|    |          |          |          |   |          |          |          |
|----|----------|----------|----------|---|----------|----------|----------|
| O  | 7.20106  | -0.97116 | -1.77503 | H | -7.21717 | -6.71784 | -3.45276 |
| O  | 5.50502  | -2.83526 | -2.44488 | H | -8.5315  | -5.65697 | -4.03781 |
| O  | 5.22508  | -0.39942 | -3.26711 | H | -2.64658 | -4.45006 | -3.06109 |
| C  | 3.83313  | -0.64251 | -3.44347 | H | -1.87522 | -4.44837 | -1.44065 |
| C  | 3.10807  | -0.67305 | -2.0908  | H | -3.9755  | -3.75867 | -0.45841 |
| O  | 1.92048  | 0.1812   | -2.16246 | H | -4.76744 | -3.90241 | -2.00159 |
| C  | 2.60536  | -2.02687 | -1.55673 | H | -3.60307 | -2.6821  | -1.71236 |
| O  | 3.34096  | -2.38287 | -0.38493 | H | 1.9576   | 6.01518  | -4.36213 |
| C  | 1.10229  | -1.79415 | -1.20953 | H | 2.68941  | 6.79881  | -2.96015 |
| O  | 0.80863  | -2.23806 | 0.08793  | H | 9.31648  | -2.05411 | -2.15682 |
| C  | 0.92928  | -0.29372 | -1.42443 | H | 6.9687   | -0.81083 | 0.00833  |
| O  | 2.38408  | 0.14685  | 0.80704  | H | -8.91129 | 1.00158  | -4.04815 |
| P  | 2.12689  | 1.4858   | 1.56747  | H | -7.92962 | -0.15251 | -3.84051 |
| O  | 2.79722  | 2.68811  | 0.92714  | H | 5.77275  | -4.72628 | 3.16615  |
| O  | 0.64873  | 1.67907  | 1.95977  | H | 5.6093   | -4.14135 | 1.70097  |
| O  | 2.94631  | 1.20196  | 3.01801  | H | -8.60688 | -3.57569 | 0.60552  |
| P  | 2.2244   | 0.25536  | 4.12063  | H | -8.53131 | -3.21335 | -0.89877 |
| O  | 1.7767   | -1.05739 | 3.41375  | H | 7.04024  | -4.31427 | -2.36476 |
| O  | 1.09705  | 0.98733  | 4.80248  | H | 7.66078  | -4.51293 | -1.00261 |
| O  | 3.43603  | -0.07384 | 5.12003  | H | 5.9342   | -3.34673 | -0.55859 |
| Mg | -0.56344 | 1.41162  | 3.61563  | H | 6.67218  | -2.70782 | 0.62418  |
| H  | 5.54294  | 3.63356  | -3.75347 | H | 2.62745  | 3.00303  | -0.80859 |
| H  | 6.17586  | 1.97082  | -3.67619 | H | 2.2414   | 3.9536   | -2.00284 |
| H  | 4.45714  | 2.99971  | -1.81307 | H | -3.97552 | 3.41183  | 5.98819  |
| H  | 7.77661  | 1.58618  | -0.00229 | H | -3.91641 | 2.42528  | 4.74664  |
| H  | 7.52995  | 1.15734  | -1.58902 | H | -2.40188 | 1.52287  | 5.63487  |
| H  | 4.52619  | 2.63287  | 0.56648  | H | -2.07367 | 0.01394  | 5.34559  |
| H  | 5.85524  | 1.68646  | 1.10302  | H | -4.90551 | -3.16628 | 1.19687  |
| H  | -4.11004 | 5.04443  | -1.36795 | H | -3.52697 | -3.6458  | 1.79383  |
| H  | -3.46653 | 6.64999  | -1.74708 | H | -0.57495 | -3.98195 | 2.90672  |
| H  | -1.37677 | 5.90854  | -1.36645 | H | 0.31678  | -4.1939  | 4.14556  |
| H  | -0.16741 | 3.42645  | 0.84981  | H | 3.34602  | -4.13241 | 2.48259  |
| H  | 0.18134  | 4.49975  | -0.5091  | H | 1.72464  | -4.03145 | 2.4399   |
| H  | -3.64659 | 3.99023  | 0.62259  | H | -6.14499 | 0.23326  | 2.05651  |
| H  | -2.43301 | 3.08911  | 1.428    | H | -6.29749 | 1.91344  | 1.50641  |



|    |          |          |          |                                   |
|----|----------|----------|----------|-----------------------------------|
| H  | -7.39299 | 0.2571   | 0.01226  |                                   |
| H  | -4.55175 | -0.76061 | -0.37143 | <b>nofixNCbound.log</b>           |
| H  | -7.01388 | -2.19448 | 0.01635  |                                   |
| H  | -5.20246 | -1.36544 | -2.66898 | no fixed bonds                    |
| H  | -7.33709 | -2.09133 | -2.42637 | C-N = 1.47                        |
| H  | -6.40434 | 1.08487  | -3.10123 | C-O = 3.10                        |
| H  | -4.90905 | 3.16544  | -3.23593 |                                   |
| H  | -1.21546 | -1.90481 | -1.84635 | B3LYP/6-31G* Lanl2DZ Mg           |
| H  | -0.11227 | 3.20698  | -2.77647 | Free Energy = -6563.344432        |
| H  | 3.44998  | 0.20577  | -4.01574 | Zero-point Energy = -6563.193803  |
| H  | 3.6661   | -1.56069 | -4.01523 | Potential Energy = -6564.50414103 |
| H  | 3.74337  | -0.21296 | -1.33332 | Nimag = 1 (16.7727 cm-1)          |
| H  | 2.73507  | -2.81617 | -2.29829 |                                   |
| H  | 3.22135  | -3.33772 | -0.22478 | Charge = 0 Multiplicity = 1       |
| H  | 0.49805  | -2.33079 | -1.94787 | C 5.92561 2.78147 -3.03668        |
| H  | -0.14576 | -1.93162 | 0.32475  | N 5.12774 2.89318 -1.81948        |
| H  | 0.44699  | 0.34417  | -0.70191 | C 5.63054 2.76311 -0.59971        |
| H  | 7.14265  | 3.32822  | -3.03362 | N 6.93395 2.37558 -0.45898        |
| H  | -3.92819 | 6.26766  | -0.07603 | N 4.91620 3.09238 0.48807         |
| H  | -8.53701 | -6.19767 | -2.36281 | C -3.88624 5.91118 -1.69768       |
| H  | -3.1641  | -5.61869 | -1.82814 | N -2.52712 5.55746 -1.34414       |
| Mg | 2.60434  | -1.64481 | 1.68459  | C -2.21606 4.69252 -0.37564       |
| O  | 4.565    | -1.51665 | 2.59793  | N -0.93831 4.36033 -0.17026       |
| H  | 4.8891   | -2.43253 | 2.78846  | N -3.17782 4.20810 0.44362        |
| H  | 5.27252  | -1.1138  | 2.04263  | C -3.51186 -4.55552 -4.59369      |
| H  | 1.11115  | 2.05106  | -2.48842 | C -3.35295 -4.59334 -3.07811      |
| H  | 4.11164  | -0.56154 | 4.6062   | O -4.41366 -4.65218 -2.37984      |
| O  | -0.78275 | 3.36292  | 4.35155  | O -2.18063 -4.55063 -2.60010      |
| H  | -0.1888  | 3.49418  | 5.10845  | C -1.07278 -5.03108 0.65595       |
| H  | -1.70231 | 3.48438  | 4.68749  | N -2.14907 -4.20573 0.05356       |
| H  | 0.09104  | -1.1015  | 3.38602  | C 1.36160 6.20487 -4.29579        |
| H  | 7.70139  | -0.79101 | 1.41633  | C 0.28047 5.80261 -3.29588        |
| H  | 9.0418   | -3.52574 | -2.53706 | O -0.72356 6.53088 -3.16415       |
| H  | 8.0036   | -2.14688 | -4.00153 | O 0.48488 4.71561 -2.63482        |
| H  | 1.46094  | 7.67442  | -3.91428 | O 9.62376 -2.04393 -1.73232       |

O 6.69691 -0.44637 1.53432  
O -7.54708 -1.83398 -4.67263  
O 4.79757 -3.48210 3.10715  
O -6.09513 -5.28379 -0.27294  
O 9.32731 -3.78272 0.38102  
O 6.73429 -3.23778 1.25744  
O 2.38435 2.96790 -2.09734  
O -4.12163 3.34060 4.82264  
O -2.32285 1.32671 5.00140  
O -4.30120 -4.27078 1.79057  
O 0.17706 -3.16537 4.15465  
O 2.13967 -3.05863 2.32062  
O -2.86804 1.84245 2.04423  
P -4.11822 0.99097 2.24716  
O -5.03641 1.31033 3.39673  
O -3.63641 -0.58065 2.41619  
P -2.20561 -1.34026 2.20093  
O -1.81527 -1.38022 0.72699  
O -1.23008 -0.31328 3.02178  
O -2.28107 -2.65941 2.93698  
O -4.93166 0.99944 0.84323  
C -6.33235 0.62060 0.83341  
C -6.62788 -0.40515 -0.25180  
C -5.65502 -1.59847 -0.28698  
O -6.11836 -2.68030 0.49025  
C -5.45846 -1.88489 -1.79343  
O -6.38236 -2.84057 -2.28401  
C -5.72000 -0.50022 -2.42240  
O -6.58787 0.20145 -1.56625  
N -4.46542 0.30881 -2.55217  
C -3.16389 -0.08422 -2.69777  
C -2.40690 1.08678 -2.67409  
N -3.21203 2.19465 -2.55603  
C -4.42206 1.68717 -2.47484  
N -2.67605 -1.33833 -2.84861  
C -1.38731 -1.42153 -2.75434  
N -0.53351 -0.34784 -2.54548  
C -0.99724 0.96511 -2.63496  
N -0.16357 1.98353 -2.63470  
O 7.32152 -2.11201 -2.96954  
P 6.42900 -1.39834 -1.86459  
O 7.26889 -0.41370 -1.03529  
O 5.63736 -2.42727 -1.04441  
O 5.38917 -0.48960 -2.72318  
C 4.16790 -0.98030 -3.30213  
C 3.01089 -0.78020 -2.32207  
O 1.78927 -0.51436 -3.03829  
C 2.64459 -1.97014 -1.39620  
O 3.29469 -1.89534 -0.14054  
C 1.09874 -1.86525 -1.23475  
O 0.73515 -1.82956 0.12977  
C 0.81532 -0.55125 -2.00694  
O 1.96114 0.66116 0.61177  
P 1.57221 2.00082 1.27325  
O 2.16272 3.22151 0.57549  
O 0.07900 2.13761 1.64131  
O 2.37282 1.89339 2.76875  
P 1.68409 0.93219 3.87312  
O 1.33512 -0.42859 3.19458  
O 0.48965 1.60146 4.50779  
O 2.88726 0.67940 4.90571  
Mg -1.17304 1.84037 3.23332  
H 5.36884 3.26373 -3.84294  
H 6.10465 1.73573 -3.30516  
H 4.10019 3.00808 -1.93580  
H 7.25321 2.32851 0.49998  
H 7.19848 1.53741 -0.98923  
H 3.89375 3.28355 0.43988  
H 5.19640 2.67783 1.36688  
H -4.46067 5.04362 -2.05269

|   |          |          |          |    |          |          |          |
|---|----------|----------|----------|----|----------|----------|----------|
| H | -3.83471 | 6.63541  | -2.51271 | H  | -0.74064 | -3.09714 | 3.79334  |
| H | -1.77429 | 5.90247  | -1.98253 | H  | 0.33908  | -2.29868 | 4.56177  |
| H | -0.67228 | 3.66264  | 0.52610  | H  | 2.95634  | -3.47921 | 2.65460  |
| H | -0.25773 | 4.60460  | -0.89819 | H  | 1.41616  | -3.19019 | 2.99724  |
| H | -4.13346 | 4.28781  | 0.13125  | H  | -6.62006 | 0.20772  | 1.80394  |
| H | -2.98301 | 3.36691  | 0.99342  | H  | -6.91652 | 1.53005  | 0.65989  |
| H | -2.54683 | -4.64854 | -5.09650 | H  | -7.64792 | -0.77505 | -0.09088 |
| H | -3.97773 | -3.60652 | -4.88413 | H  | -4.69065 | -1.27518 | 0.11523  |
| H | -0.11148 | -4.75252 | 0.22109  | H  | -6.34758 | -3.47133 | -0.06808 |
| H | -1.04559 | -4.85567 | 1.73201  | H  | -4.45074 | -2.23669 | -1.99257 |
| H | -3.05646 | -4.36589 | 0.55519  | H  | -5.82418 | -3.63691 | -2.49565 |
| H | -2.24670 | -4.39157 | -1.00257 | H  | -6.18216 | -0.58072 | -3.40998 |
| H | -1.95916 | -3.19809 | 0.19661  | H  | -5.33133 | 2.25306  | -2.34017 |
| H | 1.53824  | 5.38893  | -5.00596 | H  | -0.94006 | -2.40432 | -2.83751 |
| H | 2.30494  | 6.38425  | -3.76623 | H  | -0.50122 | 2.95000  | -2.64635 |
| H | 9.29511  | -1.21151 | -1.34555 | H  | 3.98664  | -0.36806 | -4.18895 |
| H | 6.89381  | -0.39371 | 0.54048  | H  | 4.27404  | -2.02420 | -3.61500 |
| H | -8.43805 | -1.54621 | -4.42253 | H  | 3.24459  | 0.08410  | -1.68869 |
| H | -7.24391 | -2.34908 | -3.89611 | H  | 2.90489  | -2.92086 | -1.87254 |
| H | 5.14670  | -3.87166 | 3.92302  | H  | 4.26616  | -2.07170 | -0.33782 |
| H | 5.50464  | -3.59092 | 2.41032  | H  | 0.63977  | -2.73229 | -1.71743 |
| H | -5.59682 | -5.44430 | 0.54701  | H  | -0.22641 | -1.58196 | 0.27119  |
| H | -5.41126 | -5.26933 | -0.97696 | H  | 0.98970  | 0.25443  | -1.28511 |
| H | 9.37202  | -4.69537 | 0.05835  | H  | 6.88251  | 3.29535  | -2.90798 |
| H | 8.41950  | -3.68523 | 0.75370  | H  | -4.41947 | 6.37866  | -0.85939 |
| H | 6.32541  | -3.14693 | 0.35090  | H  | -4.18223 | -5.35736 | -4.91929 |
| H | 6.84519  | -2.28727 | 1.50096  | H  | -1.27668 | -6.08399 | 0.45251  |
| H | 2.21721  | 3.01979  | -1.11641 | Mg | 2.26951  | -1.14011 | 1.50224  |
| H | 1.87230  | 3.75629  | -2.44035 | O  | 4.14299  | -0.87018 | 2.63111  |
| H | -4.76898 | 3.72187  | 5.43375  | H  | 4.40914  | -1.76865 | 2.95603  |
| H | -4.61455 | 2.69929  | 4.22954  | H  | 4.95747  | -0.51614 | 2.20648  |
| H | -3.07375 | 1.93416  | 5.19207  | H  | 0.86233  | 1.92631  | -2.58268 |
| H | -2.68663 | 0.42799  | 4.98864  | H  | 3.56473  | 0.16487  | 4.41565  |
| H | -4.94450 | -3.58920 | 1.47707  | O  | -1.54915 | 3.80132  | 3.86724  |
| H | -3.73652 | -3.80919 | 2.44808  | H  | -0.97103 | 4.00826  | 4.61963  |

H -2.47815 3.88885 4.18707  
H -0.24129 -0.54005 3.04142  
H 7.49175 -0.12635 1.98857  
H 9.58580 -2.68927 -0.97983  
H 8.27373 -2.21071 -2.63078  
H 1.07452 7.10800 -4.83757

**NofixOCbound.log**

No fixed bonds

C-N = 3.66

C-O = 1.45

B3LYP/6-31G\* Lanl2DZ Mg

Free Energy = -6563.350699

Zero-point Energy = -6563.189679

Potential Energy = -6564.49496868

Nimag = 1 (2.0078 cm-1)

Charge = 0 Multiplicity = 1

C 5.22471 3.99882 -4.08345  
N 4.79859 3.77394 -2.71351  
C 5.40546 2.93221 -1.87784  
N 6.53000 2.26825 -2.24350  
N 4.93214 2.76422 -0.63858  
C -4.25312 5.99444 -1.82849  
N -2.92387 5.42127 -1.77225  
C -2.48382 4.66573 -0.76292  
N -1.26679 4.12147 -0.83706  
N -3.22229 4.48669 0.35252  
C -4.92332 -7.60684 -2.41873  
C -4.05251 -6.46371 -1.91037  
O -4.63703 -5.48883 -1.32166  
O -2.81079 -6.52913 -2.08885

C -0.24919 -4.76148 -0.61296  
N -1.66546 -4.43112 -0.90133  
C 0.47335 5.06407 -5.45287  
C -0.29432 4.99244 -4.13369  
O -1.32116 5.68314 -3.99885  
O 0.19672 4.19837 -3.23847  
O 7.28564 -5.03476 -2.23316  
O 6.02597 0.79661 1.38117  
O -6.83791 -2.44040 -4.57923  
O 5.10038 -2.79225 3.98215  
O -6.66516 -5.04435 0.37613  
O 5.66112 -5.33622 -0.10117  
O 6.77940 -3.71084 2.07514  
O 2.49615 5.02628 -2.01186  
O -4.33498 4.07277 4.54508  
O -5.70118 4.39131 2.10544  
O -2.93934 -4.13188 1.50897  
O 0.11935 -3.13570 4.75075  
O 2.34690 -2.76267 3.38151  
O -2.76160 2.13862 1.99804  
P -4.02170 1.28824 2.18393  
O -5.11836 1.83940 3.06247  
O -3.55358 -0.16777 2.79188  
P -2.07509 -0.84661 2.67591  
O -1.56336 -0.79852 1.25173  
O -1.23934 0.29479 3.57420  
O -2.06181 -2.15316 3.42478  
O -4.58585 0.94339 0.71599  
C -5.91027 0.35973 0.61029  
C -5.93673 -0.74980 -0.42167  
C -4.86784 -1.84120 -0.23984  
O -5.21405 -2.79715 0.73283  
C -4.68571 -2.34088 -1.68733  
O -5.74626 -3.20096 -2.06740  
C -4.82378 -1.03029 -2.46946

|    |          |          |          |   |          |          |          |
|----|----------|----------|----------|---|----------|----------|----------|
| O  | -5.74877 | -0.23029 | -1.75221 | H | 5.21784  | 3.07561  | -4.67958 |
| N  | -3.55269 | -0.27333 | -2.57909 | H | 3.92053  | 4.26124  | -2.39812 |
| C  | -2.28938 | -0.69283 | -2.95660 | H | 6.74020  | 1.37537  | -1.78187 |
| C  | -1.58050 | 0.48775  | -3.22533 | H | 6.83371  | 2.34463  | -3.20250 |
| N  | -2.36380 | 1.60397  | -3.01923 | H | 4.01469  | 3.12712  | -0.36096 |
| C  | -3.51890 | 1.10981  | -2.65080 | H | 5.39565  | 2.14610  | 0.02386  |
| N  | -1.78269 | -1.94308 | -3.04150 | H | -5.03732 | 5.23042  | -1.73522 |
| C  | -0.51341 | -1.93551 | -3.46655 | H | -4.36577 | 6.47744  | -2.80079 |
| N  | 0.28186  | -0.89476 | -3.75177 | H | -2.29562 | 5.52983  | -2.59800 |
| C  | -0.23394 | 0.35561  | -3.63507 | H | -0.91415 | 3.56443  | -0.06688 |
| N  | 0.55014  | 1.41410  | -3.91587 | H | -0.74616 | 4.13368  | -1.73420 |
| O  | 7.57456  | -2.45545 | -1.90744 | H | -4.17334 | 4.82280  | 0.42379  |
| P  | 6.34586  | -1.70168 | -1.26478 | H | -3.01577 | 3.68174  | 0.94399  |
| O  | 6.72000  | -0.26641 | -0.92426 | H | -4.31435 | -8.41130 | -2.83561 |
| O  | 5.77803  | -2.51003 | -0.06324 | H | -5.60719 | -7.23119 | -3.18872 |
| O  | 5.20351  | -1.76038 | -2.42865 | H | 0.28170  | -4.95760 | -1.54718 |
| C  | 4.20226  | -0.75300 | -2.63868 | H | 0.22491  | -3.93930 | -0.07138 |
| C  | 3.47785  | -0.41230 | -1.34201 | H | -2.17681 | -4.23835 | 0.00606  |
| O  | 2.47282  | 0.58495  | -1.58972 | H | -2.16116 | -5.26432 | -1.38787 |
| C  | 2.75853  | -1.59050 | -0.64853 | H | -1.74712 | -3.61376 | -1.52390 |
| O  | 3.35438  | -1.85091 | 0.62624  | H | 0.51890  | 4.06786  | -5.90837 |
| C  | 1.32403  | -1.06153 | -0.41180 | H | 1.50526  | 5.38604  | -5.26672 |
| O  | 0.87678  | -1.45316 | 0.87040  | H | 8.12802  | -5.50434 | -2.14000 |
| C  | 1.51208  | 0.46120  | -0.58558 | H | 6.34716  | 0.27304  | 0.58511  |
| O  | 2.01325  | 0.93290  | 0.68404  | H | -7.58939 | -1.91826 | -4.26013 |
| P  | 1.68022  | 2.46609  | 1.21695  | H | -6.51212 | -2.87845 | -3.76614 |
| O  | 2.35842  | 3.49519  | 0.37542  | H | 5.48736  | -2.93509 | 4.85944  |
| O  | 0.18038  | 2.57112  | 1.48089  | H | 5.72983  | -3.20613 | 3.32580  |
| O  | 2.46320  | 2.30481  | 2.64911  | H | -6.36123 | -5.40782 | 1.22288  |
| P  | 1.76076  | 1.55740  | 3.93340  | H | -6.02419 | -5.41377 | -0.28454 |
| O  | 1.41359  | 0.11756  | 3.50300  | H | 5.38315  | -4.40526 | -0.22780 |
| O  | 0.56435  | 2.34763  | 4.39579  | H | 6.13906  | -5.28038 | 0.74649  |
| O  | 2.97308  | 1.53625  | 4.97094  | H | 6.54191  | -3.15813 | 1.27543  |
| Mg | -1.06848 | 2.33275  | 3.04751  | H | 7.72944  | -3.57832 | 2.21721  |
| H  | 4.51950  | 4.69694  | -4.53762 | H | 2.28819  | 4.76545  | -1.09456 |

|   |          |          |          |    |          |          |          |
|---|----------|----------|----------|----|----------|----------|----------|
| H | 1.71076  | 4.71095  | -2.53075 | H  | 4.20028  | 0.00298  | -0.63476 |
| H | -4.73116 | 4.55633  | 3.78727  | H  | 2.77149  | -2.50600 | -1.24566 |
| H | -4.62503 | 3.15345  | 4.34619  | H  | 4.30993  | -2.11677 | 0.46095  |
| H | -6.63524 | 4.64382  | 2.16542  | H  | 0.65229  | -1.42253 | -1.19154 |
| H | -5.67601 | 3.42909  | 2.32792  | H  | -0.11284 | -1.20736 | 1.00120  |
| H | -3.81710 | -3.74051 | 1.28475  | H  | 0.62192  | 1.01683  | -0.87929 |
| H | -2.58777 | -3.54565 | 2.21060  | H  | 6.22499  | 4.44831  | -4.13437 |
| H | -0.68448 | -2.87955 | 4.22790  | H  | -4.40971 | 6.75423  | -1.05048 |
| H | 0.03726  | -2.62869 | 5.57245  | H  | -5.54273 | -7.99539 | -1.60265 |
| H | 3.17651  | -3.09392 | 3.77603  | H  | -0.22564 | -5.66045 | 0.00542  |
| H | 1.54866  | -2.97081 | 3.95782  | Mg | 2.38609  | -1.09093 | 2.26121  |
| H | -6.22577 | -0.05836 | 1.57053  | O  | 4.23088  | -0.37134 | 3.08668  |
| H | -6.60302 | 1.16015  | 0.33159  | H  | 4.69014  | -1.16080 | 3.47611  |
| H | -6.93212 | -1.21364 | -0.37237 | H  | 4.87775  | 0.06605  | 2.46621  |
| H | -3.93286 | -1.37987 | 0.09106  | H  | 1.53645  | 1.22369  | -4.01638 |
| H | -5.88134 | -3.46162 | 0.40620  | H  | 3.65318  | 0.92912  | 4.59882  |
| H | -3.72362 | -2.81942 | -1.86234 | O  | -1.78351 | 3.83438  | 4.16305  |
| H | -5.41561 | -4.12720 | -1.92940 | H  | -1.28560 | 4.05912  | 4.96305  |
| H | -5.22221 | -1.20160 | -3.47316 | H  | -2.77801 | 3.99428  | 4.32867  |
| H | -4.39716 | 1.68468  | -2.40164 | H  | -0.29755 | 0.00886  | 3.72135  |
| H | -0.05280 | -2.91576 | -3.58798 | H  | 6.81887  | 1.17690  | 1.79046  |
| H | 0.27525  | 2.37746  | -3.68725 | H  | 6.71973  | -5.32351 | -1.46544 |
| H | 4.66118  | 0.14964  | -3.05573 | H  | 7.45005  | -3.45019 | -2.08025 |
| H | 3.50186  | -1.16561 | -3.36998 | H  | -0.00437 | 5.75994  | -6.14521 |

## REFERENCE

1. Stroek, R., Ge, Y., Talbot, P. D., Glok, M. K., Bernas, K. E., Thomson, C. M., Gould, E. R., Alphey, M. S., Liu, H., Florence, G. J., Naismith, J. H., and da Silva, R. G. (2017) Kinetics and structure of a cold-adapted hetero-octameric atp phosphoribosyltransferase, *Biochemistry* 56, 793-803.
